# Supplementary material for: Enhancing photoluminescence efficiency of atomically precise copper(i) nanoclusters through a solvent-induced structural transformation
Source: Royal Society of Chemistry journal article supplement (doi:10.1039/d2qi01427k), 2022-01-01
Supplement: d2qi01427k1.pdf [file d2qi01427k1.pdf]

## **Enhancing photoluminescence efficiency of atomically precise copper(I) nanoclusters through solvent-induced structural transformation**

Su-Kao Peng,<sup>+</sup> Hu Yang,<sup>+</sup> Dong Luo, Mo Xie, Wen-Jing Tang, Guo-Hong Ning\* and Dan Li\*

<sup>+</sup>S.-K. P. and H. Y. contributed equally to this work

College of Chemistry and Materials Science, Guangdong Provincial Key Laboratory of Functional Supramolecular Coordination Materials and Applications, Jinan University, Guangzhou 510632, China.

E-mail: guohongning@jnu.edu.cn, danli@jnu.edu.cn

## Experiment detail

### Material and method.

All starting materials and solvents were purchased from commercial sources and without further purification. Element analysis was carried out by Elementar Vario Micro Cube. Fourier-transfer infrared (FT-IR) spectra were recorded on a Thermo Scientific FT-IR Nicolet iS<sub>10</sub> spectrophotometer from 4000 cm<sup>-1</sup> to 400 cm<sup>-1</sup>. The solid-state ultraviolet-visible (UV-vis) absorption spectra were recorded on the Bio-Logic MOS-500 multifunctional circular dichroism spectrometer, while solution UV-vis absorption spectra were measured by Agilent Cary 4000 UV-Vis spectrophotometer. Rigaku Ultima IV X-ray diffractometer, using the Cu K $\alpha$  ( $\lambda = 1.5418 \text{ \AA}$ , step = 0.02 $^\circ$ ), collected the data of powder x-ray diffraction under the conditions 40 kV and 40 mA. Thermogravimetric analysis (TGA) was performed on TGA Q50 V20.6 with N<sub>2</sub> atmosphere heating rate of 10  $^\circ\text{C}/\text{min}$  and temperatures ranging from 40  $^\circ\text{C}$  to 800  $^\circ\text{C}$ . The NMR signals were recorded by Bruker Ascend 400, using CD<sub>2</sub>Cl<sub>2</sub> as solvent. X-ray photoelectron spectroscopy (XPS) was performed by Thermo Scientific™ K-Alpha™. ESI-MS spectra were recorded with a Waters Synapt G2-Si mass spectrometer and all the samples were dissolved in HPLC-grade dichloromethane before performing mass spectrometric analyses.

Horiba FluoroMax-4 fluorometer was used for steady-state photoluminescence spectra measurement for all samples and Janis VPF-100 cryostat system was used for temperature-controlled measurement by adopting liquid nitrogen. The Decay curves were recorded by an Edinburgh FLS920 spectrometer, which is equipped with a  $\mu\text{F900}$   $\mu\text{s}$  flash lamp and a closed-cycle cryostat (Advanced Research Systems) using liquid helium as a cooling medium. Hamamatsu C11347-01 absolute PL quantum yield spectrometer was used for the absolute photoluminescence quantum yields measurement under room temperature. The crystal samples were used for all photoluminescence measurements in solid sample states, and the crystal phase purity of the samples was ensured by elemental analysis and powder X-ray diffraction measurements.

Single-crystal data were collected on an Oxford Diffraction XtalAB [Rigaku (Cu) X-ray dual-wavelength source K $\alpha$ ,  $\lambda = 1.5418 \text{ \AA}$ ] equipped with a monochromometer and CCD plate detector with a temperature of 100 K (CrysAlisPro CCD, Oxford Diffraction Ltd.). The structure was solved by the ShelXT<sup>1</sup> direct method in OLEX2 program package<sup>2</sup> and all non-hydrogen atoms were refined with anisotropically by the full-matrix least-square method on F2 by using the ShelXL program<sup>3</sup>. The treatment of disordered guest molecules in cavities involves the SQUEEZE program using PLATON. Crystal data and structure refinement parameters are summarized in Table S1. Selected bond lengths and angles are given in TableS2 – S4. CCDC nos. 2182733-2182738. The data are available free of charge from the Cambridge Crystallographic Data Centre.

## Crystal structure and data

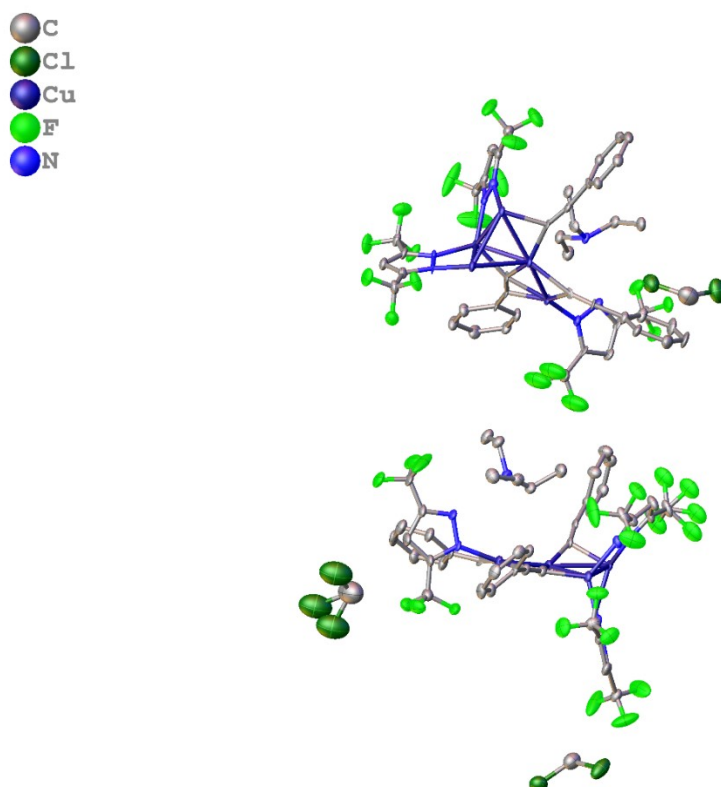

Fig. S1 The asymmetry unit of  $\text{Cu}_{10}$ .

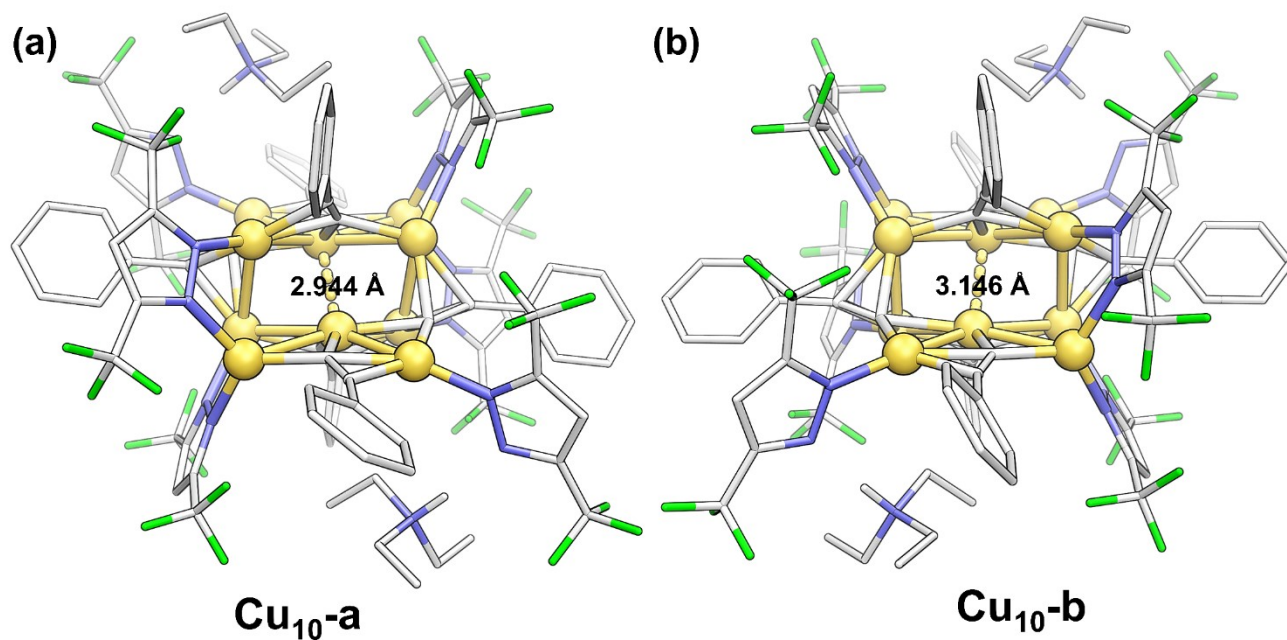

Fig. S2 The crystal structures of  $\text{Cu}_{10}$ -a and  $\text{Cu}_{10}$ -b, showing different  $\text{Cu}\cdots\text{Cu}$  distance in  $\text{Cu}_{10}$  core.

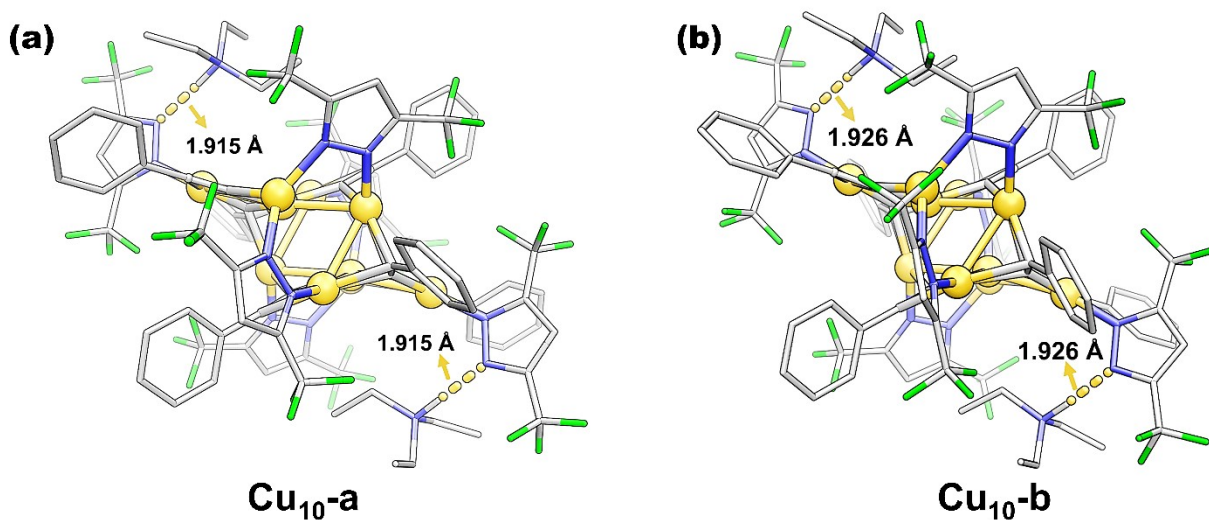

**Fig. S3** The hydrogen bond formed between (a) **Cu<sub>10</sub>-a**/(b) **Cu<sub>10</sub>-b** and  $\text{Et}_3\text{NH}^+$  cations.

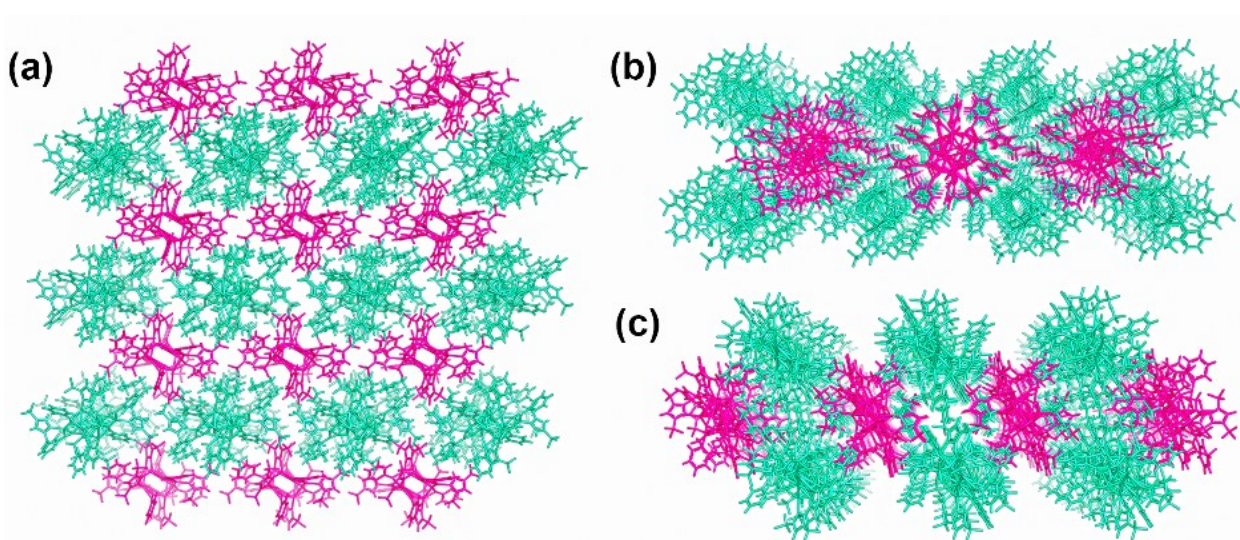

**Fig. S4** The packing mode of **Cu<sub>10</sub>** viewed from (a) a axis, (b) b axis and (c) c axis. Purple and cyan represent for **Cu<sub>10</sub>-a** and **Cu<sub>10</sub>-b**, respectively.

**Table S1.** Crystallographic data for **Cu<sub>10</sub>** and **Cu<sub>18</sub>**

|                           | <b>Cu<sub>10</sub></b>                                                          | <b>Cu<sub>18</sub></b>                                                  |
|---------------------------|---------------------------------------------------------------------------------|-------------------------------------------------------------------------|
| Empirical formula         | $\text{C}_{93}\text{H}_{74}\text{Cl}_6\text{Cu}_{10}\text{F}_{36}\text{N}_{14}$ | $\text{C}_{127}\text{H}_{68}\text{ClCu}_{18}\text{F}_{36}\text{N}_{12}$ |
| Formula weight            | 2919.76                                                                         | 3612.40                                                                 |
| Temperature (K)           | 100.00(16)                                                                      | 293 (2)                                                                 |
| Wavelength ( $\text{Å}$ ) | 1.54184                                                                         | 1.54184                                                                 |
| Crystal system            | Triclinic                                                                       | Monoclinic                                                              |
| space group               | <i>P</i> -1                                                                     | <i>P</i> 2(1)/ <i>n</i>                                                 |
| a ( $\text{Å}$ )          | 15.3985(3)                                                                      | 18.3419(2)                                                              |

|                                                    |                  |                   |
|----------------------------------------------------|------------------|-------------------|
| b (Å)                                              | 18.9186(3)       | 17.1774(2)        |
| c (Å)                                              | 18.9345(4)       | 20.5081(3)        |
| Volume (Å <sup>3</sup> )                           | 5395.91(18)      | 6460.80(14)       |
| Z                                                  | 2                | 2                 |
| $\rho_{\text{calc}}$ (Mg/cm <sup>3</sup> )         | 1.797            | 1.863             |
| $R_{\text{int}}$                                   | 0.0749           | 0.035             |
| Completeness (%)                                   | 99.5             | 99.7              |
| Data / restraints /<br>parameters                  | 22099 / 9 / 1390 | 13212 / 174 / 787 |
| Goodness-of-fit on F <sup>2</sup>                  | 1.016            | 1.064             |
| $R_1^a$ [I>2sigma(I)]                              | 0.0953           | 0.0970            |
| $wR_2^b$ (all data)                                | 0.2394           | 0.2587            |
| Largest diff. peak<br>and hole (e/Å <sup>3</sup> ) | 4.447 , -2.192   | 2.637, -2.043     |

<sup>a</sup> $R_1 = \Sigma|F_o| - |F_c|/\Sigma|F_o|$ , <sup>b</sup>  $wR_2 = \{[\Sigma w(F_o^2 - F_c^2)^2]/\Sigma[w(F_o^2)^2]\}^{1/2}$ ;  $w = 1/[\sigma^2(F_o^2) + (aP)^2 + bP]$ , where  $P = [\max(F_o^2, 0) + 2F_c^2]/3$  for all data.

**Table S2.** Comparisons of bond lengths (Å) in **Cu<sub>10</sub>**, and **Cu<sub>18</sub>**

| Bond type           | Cu <sub>10</sub> -a | Cu <sub>10</sub> -b |
|---------------------|---------------------|---------------------|
| Cu-Cu               | 2.491~2.741         | 2.503~2.671         |
| $\sigma$ -type Cu-C | 1.955 ~ 2.197       | 1.925~2.210         |
| $\pi$ -type Cu-C    | 2.028~2.243         | 2.024~2.299         |
| Cu-N                | 1.939~1.994         | 1.931~1.995         |

**Table S3.** Comparisons of bond lengths (Å) in **Cu<sub>10</sub>**, and **Cu<sub>18</sub>**

| Bond type | Cu <sub>10</sub>       | Cu <sub>18</sub>        |
|-----------|------------------------|-------------------------|
| Cu-Cu     | 2.4910(13)- 2.7406(14) | 2.4905(13) - 2.7335(13) |
| Cu-C      | 1.955(6) - 2.4910(13)  | 1.852(7) - 2.509(7)     |
| Cu-N      | 1.934(6) - 1.996(6)    | 1.891(6) - 2.017(6)     |

# NMR

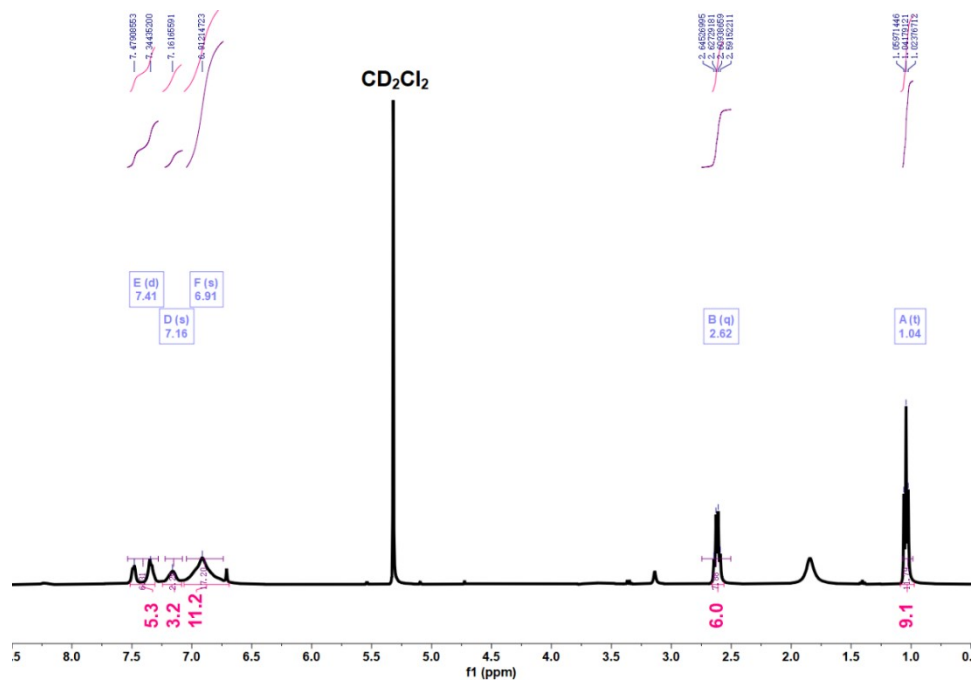

**Fig. S5** <sup>1</sup>H NMR spectrum of **Cu<sub>10</sub>** in CD<sub>2</sub>Cl<sub>2</sub>.

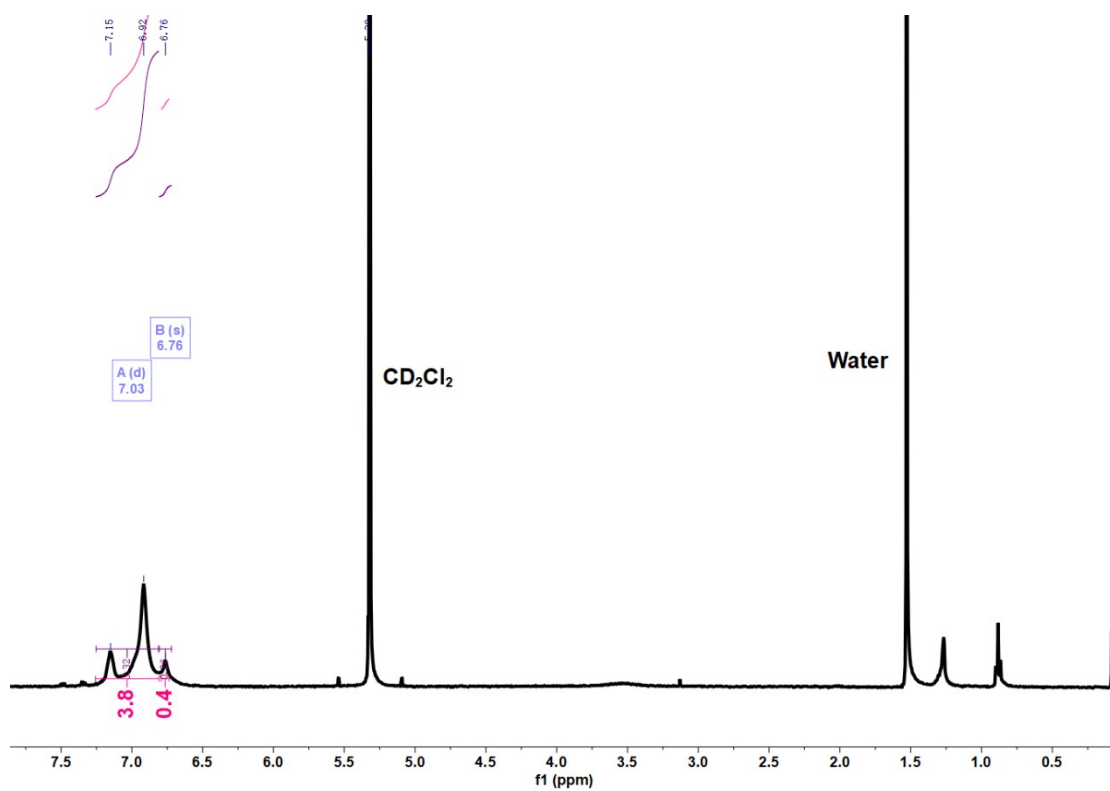

**Fig. S6** <sup>1</sup>H NMR spectrum of **Cu<sub>18</sub>** in CD<sub>2</sub>Cl<sub>2</sub>.

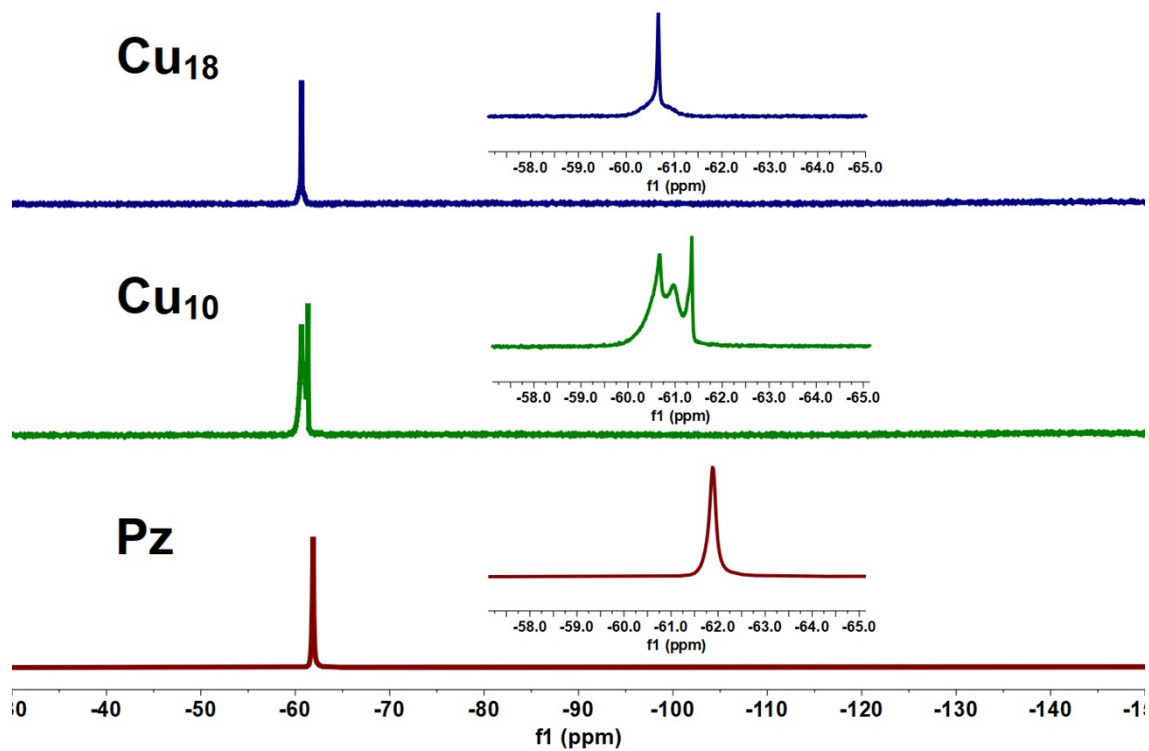

Fig. S7  $^{19}\text{F}$  NMR spectrum of 3,5-( $\text{CF}_3$ ) $_2$ -pz,  $\text{Cu}_{10}$  and  $\text{Cu}_{18}$  in  $\text{CD}_2\text{Cl}_2$ .

MS

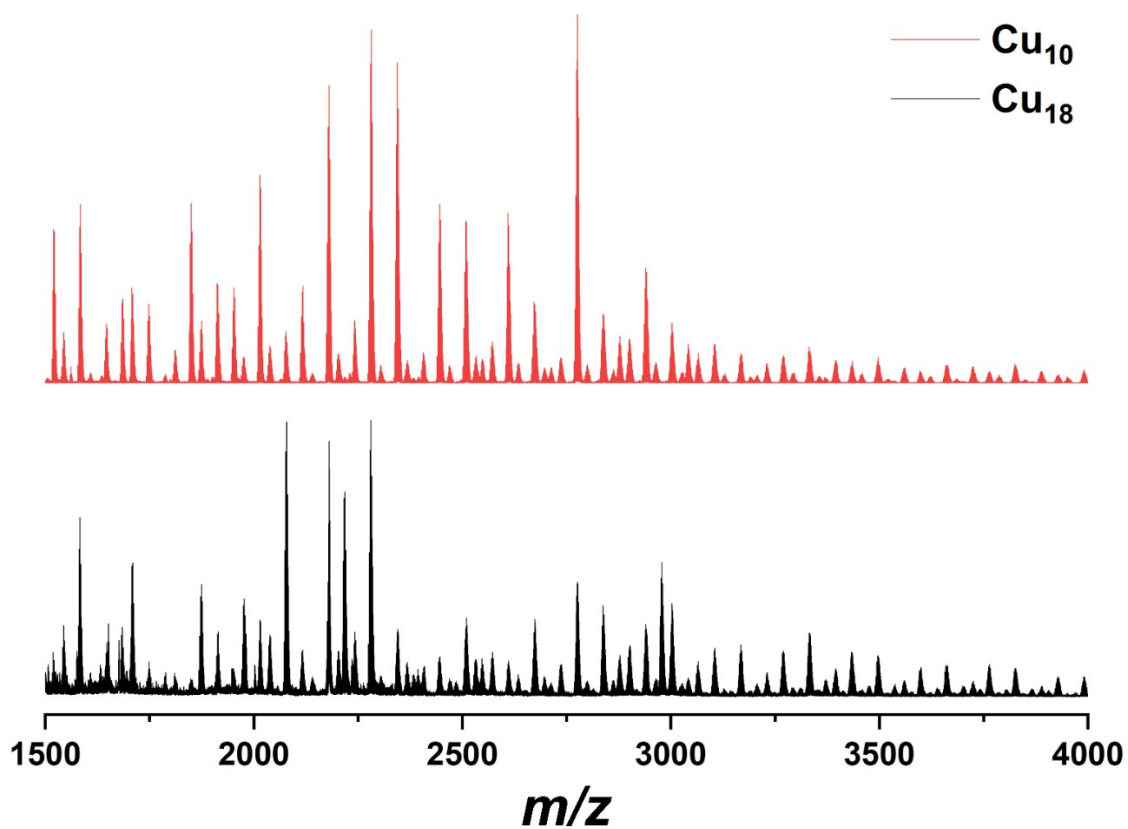

Fig. S8 Mass spectra ( $m/z$  range: 1500 – 4000) of (red)  $\text{Cu}_{10}$  and (black)  $\text{Cu}_{18}$ .

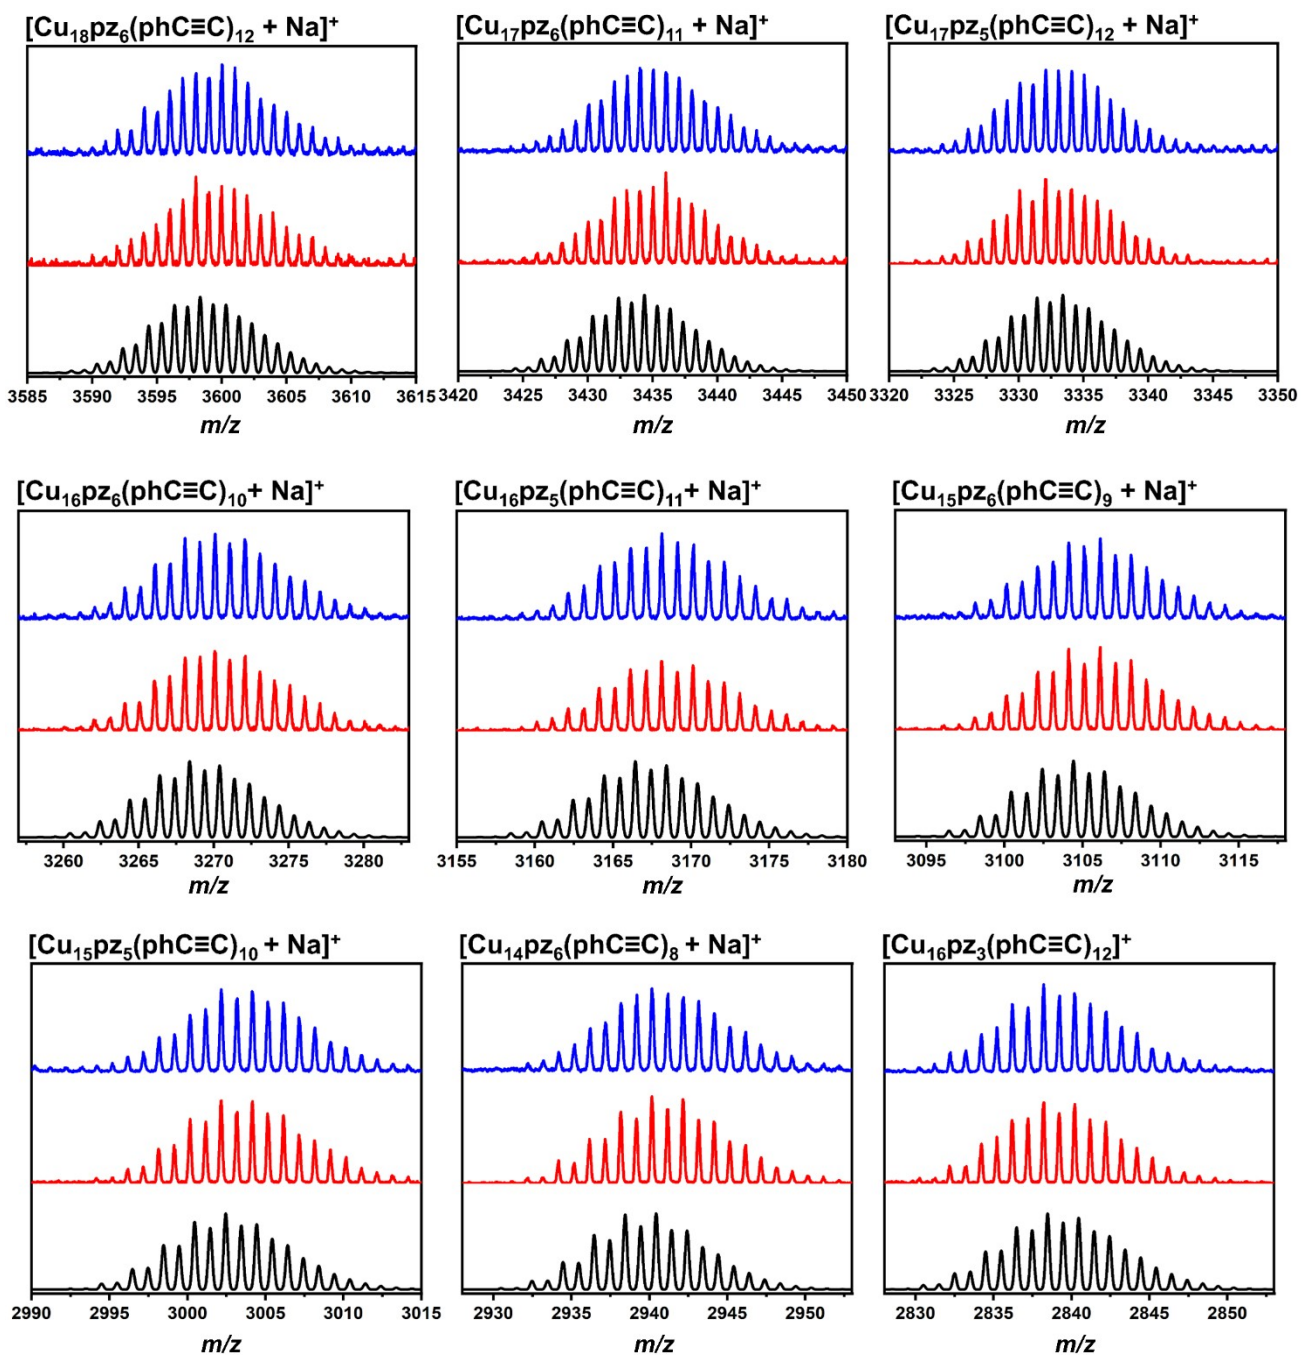



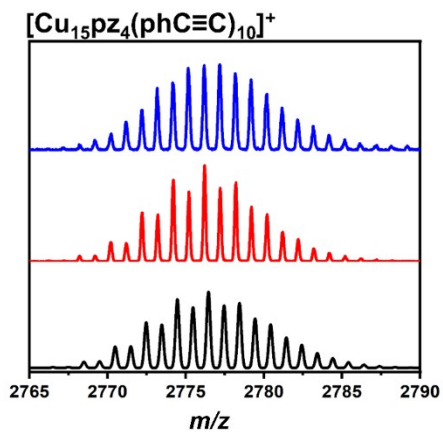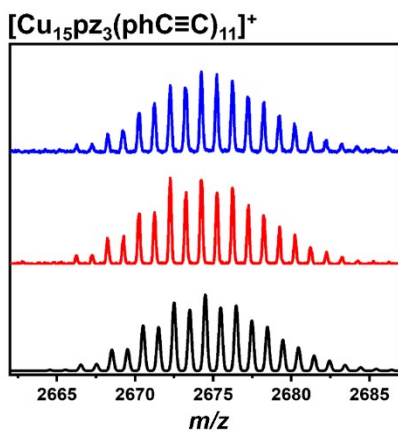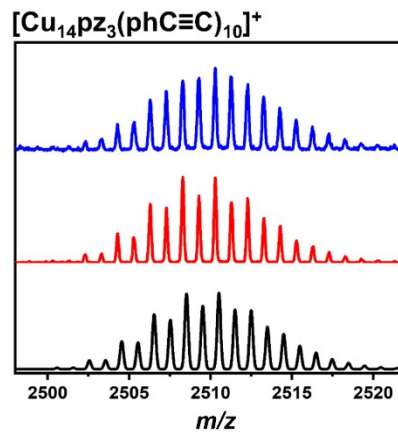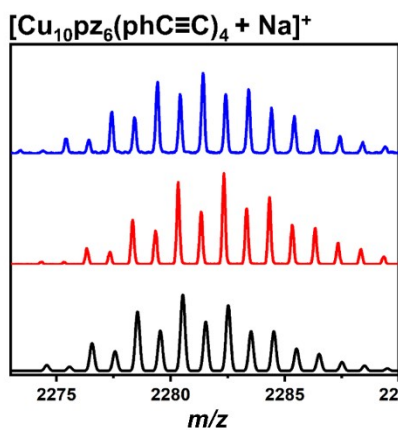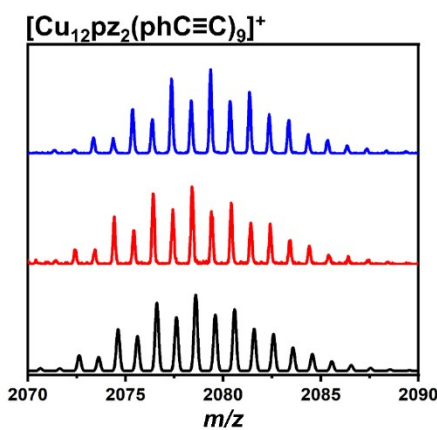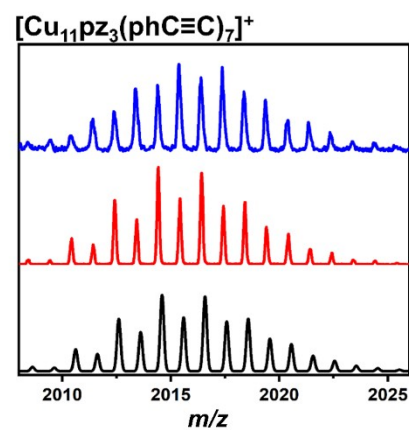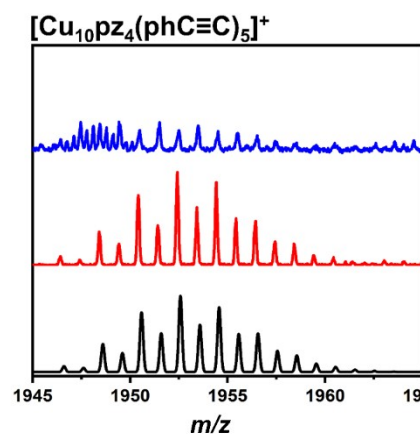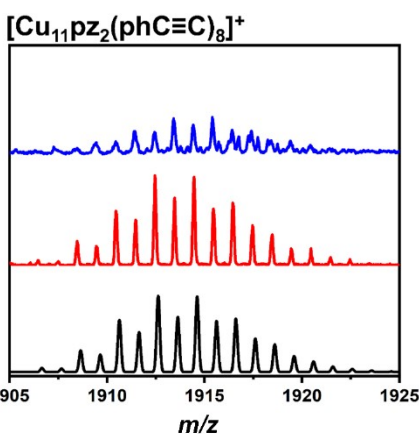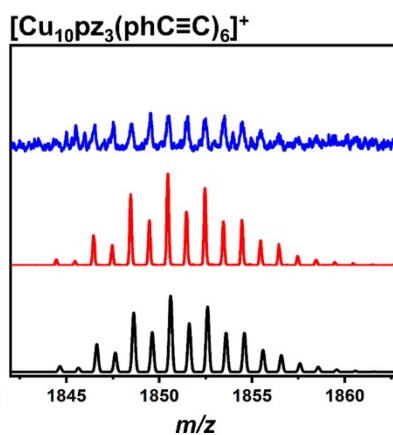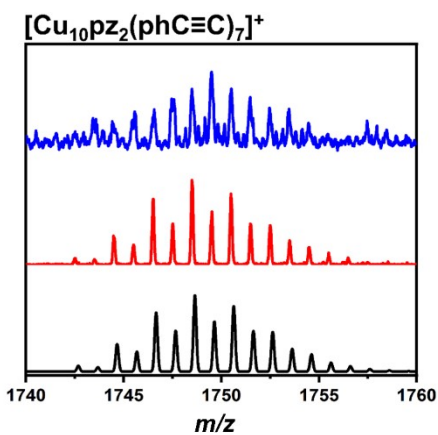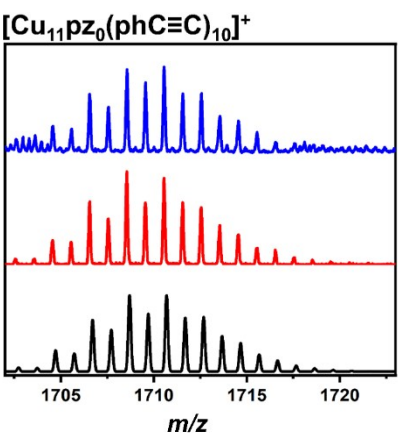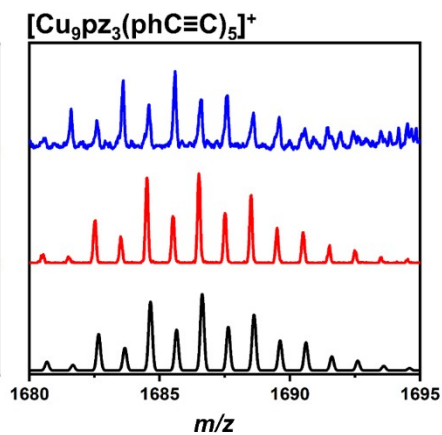

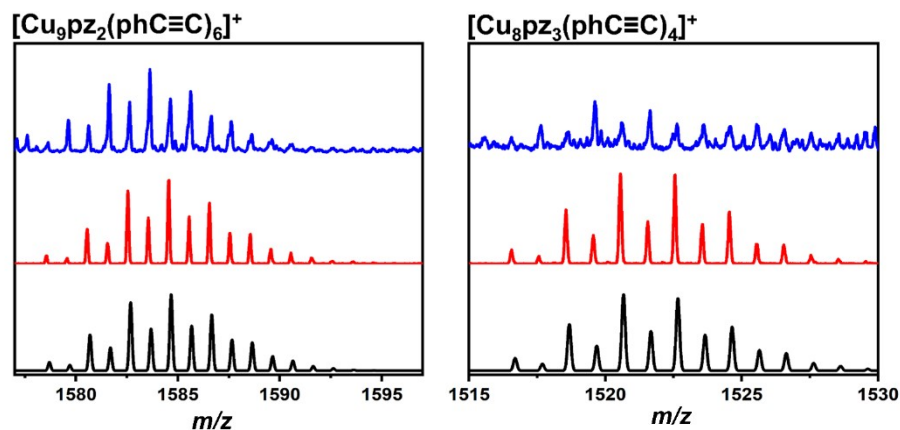

**Fig. S9** Mass spectra of all nanoclusters corresponding to copper-containing species. Color representation: black, simulation; red,  $\text{Cu}_{10}$  and blue,  $\text{Cu}_{18}$ .

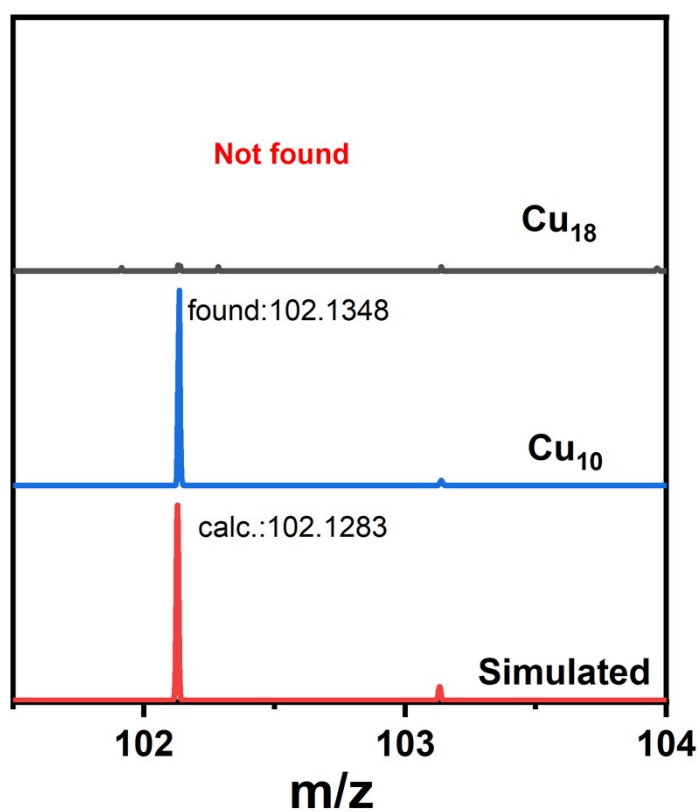

**Fig. S10** Mass spectrum of counter cation ( $\text{Et}_3\text{NH}^+$ ) of  $\text{Cu}_{10}$  and  $\text{Cu}_{18}$  in positive mode.

Note: Unfortunately, the monodispersed Cu alkyl cluster can't be observed in the test of the high-resolution mass spectrum due to them tend to dissociate, resulting in one set of fragment peaks. Therefore, only a series of heterogeneous peaks belonging to fragments are observed in the ESI-MS spectra of  $\text{Cu}_{10}$  and  $\text{Cu}_{18}$ .

## PXRD

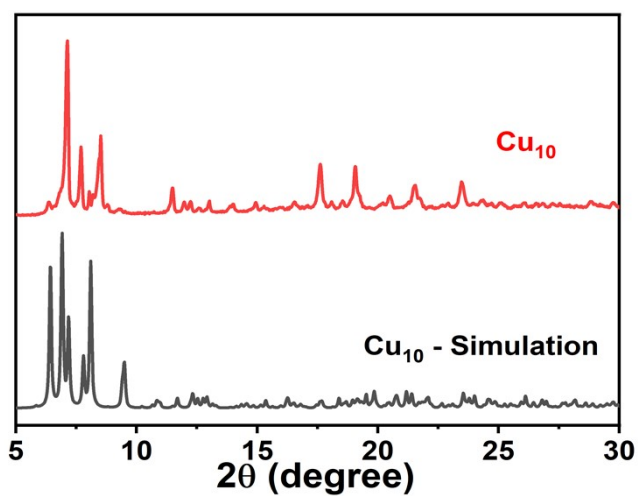

Fig. S11 Powder X-Ray Diffraction of experimental and simulation of  $\text{Cu}_{10}$ .

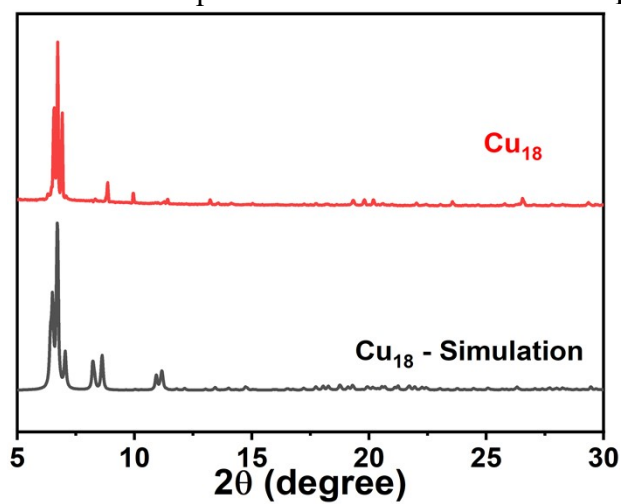

Fig. S12 Powder X-Ray Diffraction of experimental and simulation of  $\text{Cu}_{18}$ .

## FT-IR

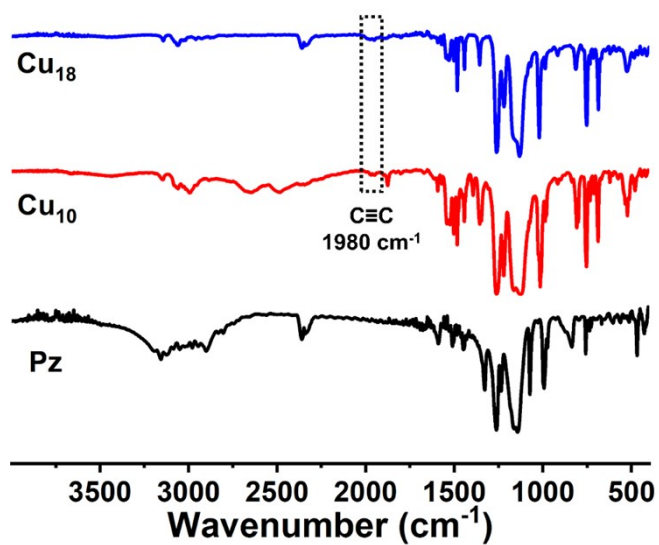

Fig. S13 FT-IR spectra of Pz,  $\text{Cu}_{10}$  and  $\text{Cu}_{18}$ .

## XPS

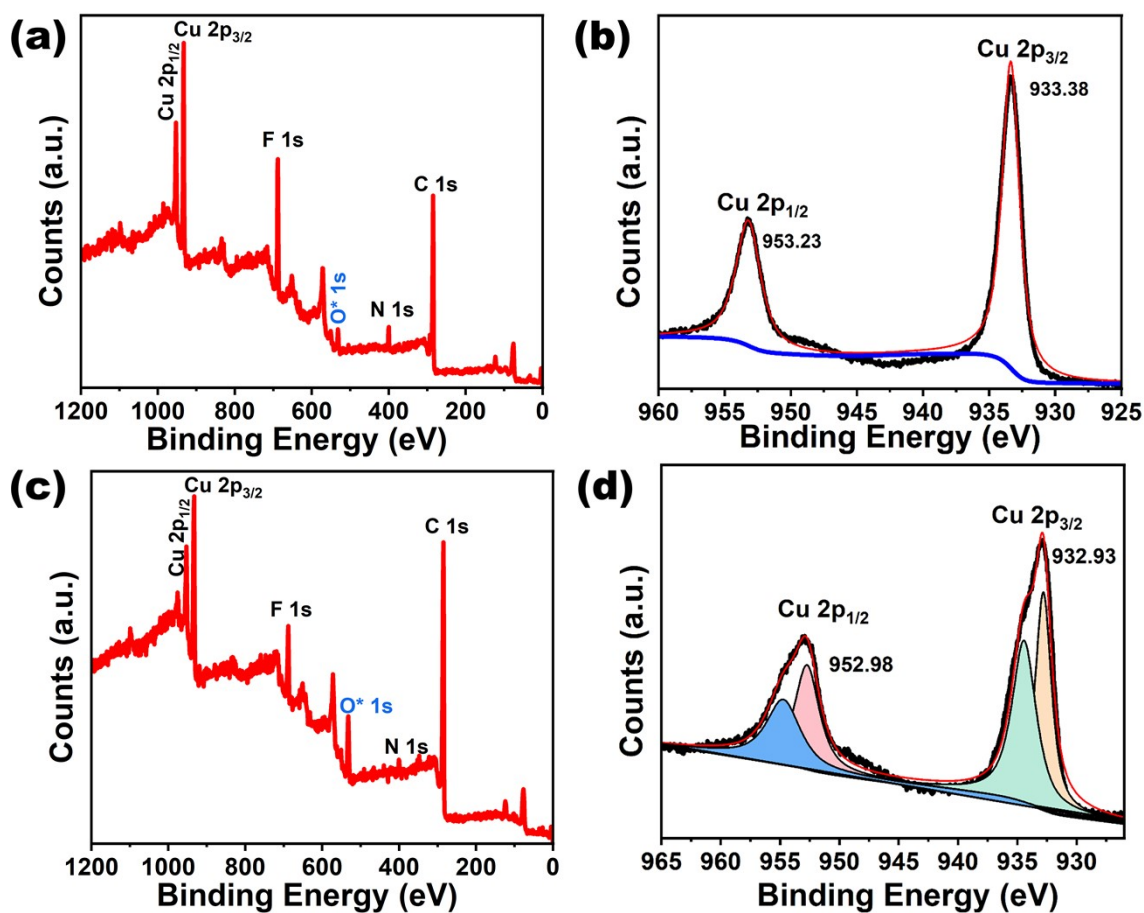

**Fig. S14** XPS spectra of (a)  $\text{Cu}_{10}$  and (c)  $\text{Cu}_{18}$ , XPS binding energies of copper regions for (b)  $\text{Cu}_{10}$  and (d)  $\text{Cu}_{18}$ .

**Note:** The alkynes in  $\text{Cu}_{18}$  exhibit a more complicated ligation mode compared to  $\text{Cu}_{10}$  (Fig. 2, Fig. 3), which results in multiple chemical environments of  $\text{Cu(I)}$ , thus affecting the binding energy and inducing the minor split of peaks (Fig. S14d).

## TGA

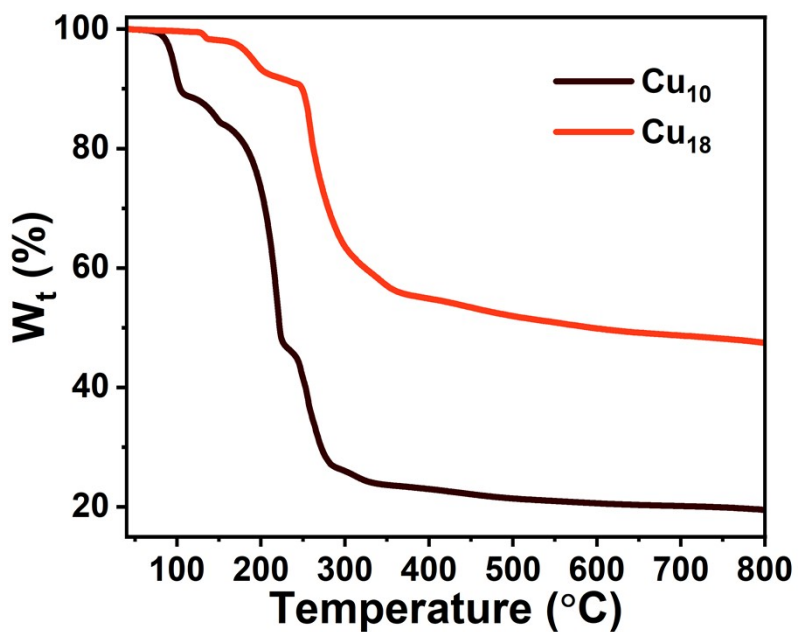

Fig. S15 Thermo gravimetric curves of  $\text{Cu}_{10}$  and  $\text{Cu}_{18}$ .

### Photoluminescence data

**Table S4** The photoluminescence photophysical parameters of  $\text{Cu}_{10}$  and  $\text{Cu}_{18}$  in solid-state

| Nanoclusters     | T / K | $\lambda_{\text{abs}}/\text{nm}$ | $\lambda_{\text{ex}}/\text{nm}$ | $\lambda_{\text{em}}/\text{nm}$ | $\tau_{\text{av}}/\mu\text{s}$ | $\Phi_{\text{PL}}$ | $k_r/\text{s}^{-1}$ | $k_{nr}/\text{s}^{-1}$ |
|------------------|-------|----------------------------------|---------------------------------|---------------------------------|--------------------------------|--------------------|---------------------|------------------------|
| $\text{Cu}_{10}$ | 300   | 317                              |                                 | 514, 556, 695                   | 8.4                            | 0.35               | $4.17 \times 10^4$  | $7.74 \times 10^4$     |
|                  | 77    |                                  | 400                             | 514, 565, 627                   | 29.0                           |                    |                     |                        |
| $\text{Cu}_{18}$ | 300   | 348                              |                                 | 620                             | 2.8                            | 0.63               | $2.25 \times 10^5$  | $1.32 \times 10^5$     |
|                  | 77    |                                  | 500                             | 644                             | 58.8                           |                    |                     |                        |

### Lifetime

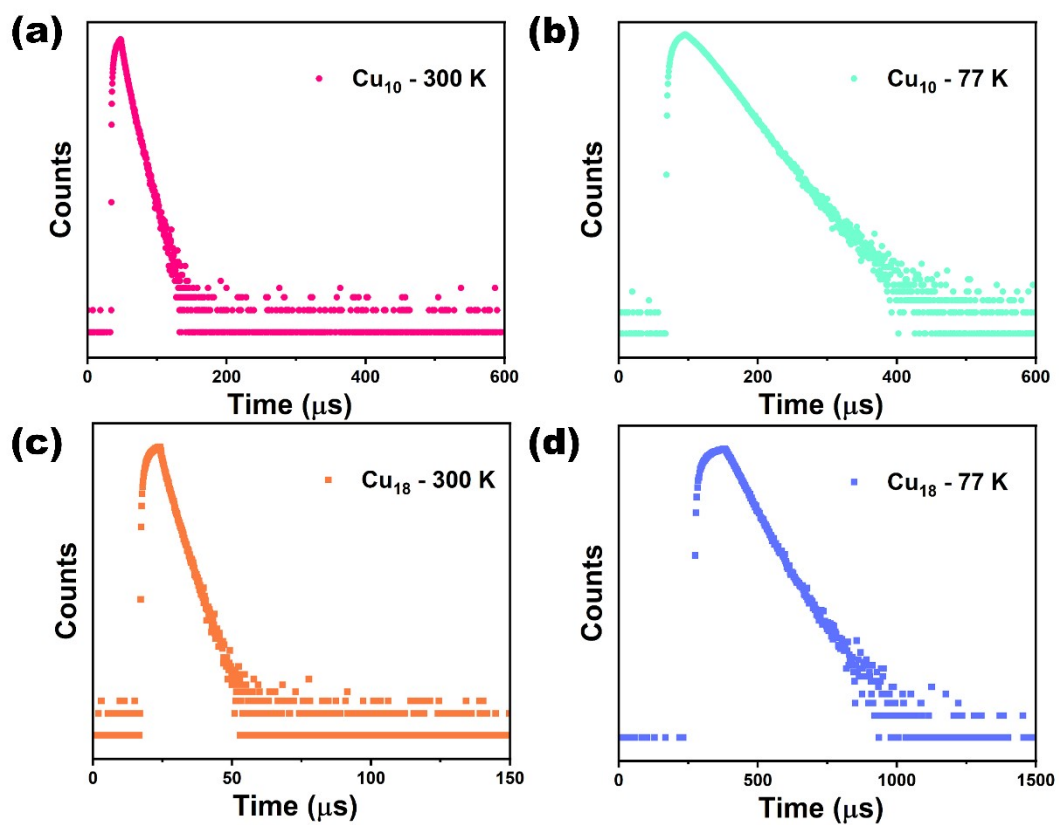

Fig. S16. Photoluminescence decay curve of (a)  $\text{Cu}_{10}$  and (c)  $\text{Cu}_{18}$  under 300 K and 77 K.

**Table S5** Summary of photophysical parameters of all reported atomically precise CuNCs, including protected by S<sup>-</sup>, P<sup>-</sup>, I and C≡C<sup>-</sup> ligand.

| Cu-cluster                                                                                                                                                                                                             | Ligand                                                                   | $\lambda_{em}$<br>(nm) | PL<br>QY | T[us]  | $kr(s^{-1})$         | ref. |
|------------------------------------------------------------------------------------------------------------------------------------------------------------------------------------------------------------------------|--------------------------------------------------------------------------|------------------------|----------|--------|----------------------|------|
| Cu <sub>24</sub> S <sub>12</sub> (PEt <sub>2</sub> Ph) <sub>12</sub>                                                                                                                                                   | PEt <sub>2</sub> Ph                                                      | 680                    | 0.390    | 1.45   | 2.69×10 <sup>5</sup> | 5    |
| Cu <sub>4</sub> I <sub>4</sub> (PPh <sub>2</sub> (CH <sub>2</sub> ) <sub>2</sub> (CH <sub>3</sub> ) <sub>2</sub> SiOSi-(CH <sub>3</sub> ) <sub>2</sub> (CH <sub>2</sub> ) <sub>2</sub> PPh <sub>2</sub> ) <sub>2</sub> |                                                                          | 522                    | 0.620    | 2.60   | 2.38×10 <sup>5</sup> | 6    |
| This work                                                                                                                                                                                                              | Phenylacetylene, 3,5-(CF <sub>3</sub> ) <sub>2</sub> Pz                  | 620                    | 0.630    | 2.80   | 2.25×10 <sup>5</sup> |      |
| Cu <sub>4</sub> I <sub>4</sub> (PPh <sub>3</sub> ) <sub>4</sub>                                                                                                                                                        | Triphenylphosphine                                                       | 535                    | 0.910    | 4.20   | 2.17×10 <sup>5</sup> | 7    |
| Cu <sub>6</sub> I <sub>6</sub> (PPh <sub>2</sub> (CH <sub>2</sub> ) <sub>3</sub> PPh <sub>2</sub> ) <sub>3</sub>                                                                                                       | 1,3-bis(diphenylphosphino)propane                                        | 655                    | 0.390    | 2.125  | 1.84×10 <sup>5</sup> | 7    |
| [Cu <sub>11</sub> (TBBT) <sub>9</sub> (PPh <sub>3</sub> ) <sub>6</sub> ](SbF <sub>6</sub> ) <sub>2</sub>                                                                                                               | 4-tert-butylbenzenethiol                                                 | 675                    | 0.220    | 1.30   | 1.69×10 <sup>5</sup> | 8    |
| Cu <sub>4</sub> I <sub>4</sub> (PPh <sub>2</sub> (CH <sub>2</sub> ) <sub>2</sub> (CH <sub>3</sub> ) <sub>2</sub> SiOSi-(CH <sub>3</sub> ) <sub>2</sub> (CH <sub>2</sub> ) <sub>2</sub> PPh <sub>2</sub> ) <sub>3</sub> |                                                                          | 571                    | 0.670    | 6.10   | 1.10×10 <sup>5</sup> | 6    |
| Cu <sub>12</sub> S <sub>6</sub> (dppo) <sub>4</sub>                                                                                                                                                                    | dppo =Ph <sub>2</sub> P(CH <sub>2</sub> ) <sub>8</sub> PPh <sub>2</sub>  | 665                    | 0.670    | 6.50   | 1.03×10 <sup>5</sup> | 9    |
| Cu <sub>12</sub> Se <sub>6</sub> (dppo) <sub>4</sub>                                                                                                                                                                   | dppo =Ph <sub>2</sub> P(CH <sub>2</sub> ) <sub>8</sub> PPh <sub>2</sub>  | 638                    | 0.530    | 5.26   | 1.01×10 <sup>5</sup> | 5    |
| Cu <sub>10</sub> (12-C≡C-closo-CB <sub>11</sub> H <sub>11</sub> ) <sub>5</sub> (4-CH <sub>3</sub> Py) <sub>9</sub>                                                                                                     | 12-C≡C-closo-CB <sub>11</sub> H <sub>21</sub>                            | 670                    | 0.560    | 6.37   | 8.79×10 <sup>4</sup> | 10   |
| Cu <sub>8</sub> (12-C≡C-closo-CB <sub>11</sub> H <sub>11</sub> ) <sub>4</sub> (3-CH <sub>3</sub> Py) <sub>8</sub> (NH <sub>3</sub> )                                                                                   | 12-C≡C-closo-CB <sub>11</sub> H <sub>20</sub>                            | 660                    | 0.460    | 5.83   | 7.89×10 <sup>4</sup> | 10   |
| Cu <sub>12</sub> S <sub>6</sub> (dpppt) <sub>4</sub>                                                                                                                                                                   | dpppt =Ph <sub>2</sub> P(CH <sub>2</sub> ) <sub>5</sub> PPh <sub>2</sub> | 648                    | 0.480    | 6.10   | 7.87×10 <sup>4</sup> | 9    |
| Cu <sub>14</sub> (C <sub>2</sub> B <sub>10</sub> H <sub>10</sub> S <sub>2</sub> ) <sub>6</sub> (CH <sub>3</sub> CN) <sub>8</sub>                                                                                       | C <sub>2</sub> B <sub>10</sub> H <sub>10</sub> S <sub>2</sub> H          | 637,<br>661            | 0.310    | 5.13   | 6.04×10 <sup>4</sup> | 11   |
| [Cu <sub>4</sub> (PCP) <sub>3</sub> ][BF <sub>4</sub> ]                                                                                                                                                                | PCP = 2,6-(PPh <sub>2</sub> ) <sub>2</sub> C <sub>6</sub> H <sub>3</sub> | 518                    | 0.500    | 9.800  | 5.10×10 <sup>4</sup> | 12   |
| This work                                                                                                                                                                                                              | Phenylacetylene, 3,5-(CF <sub>3</sub> ) <sub>2</sub> Pz                  | 514,<br>556            | 0.350    | 8.40   | 4.17×10 <sup>4</sup> |      |
| [Cu <sub>6</sub> (C <sub>2</sub> C <sub>6</sub> H <sub>4</sub> NMe <sub>2</sub> ) <sub>4</sub> {(PPh <sub>2</sub> ) <sub>3</sub> CH} <sub>2</sub> ](PF <sub>6</sub> ) <sub>2</sub>                                     | C <sub>2</sub> -4-C <sub>6</sub> H <sub>4</sub> -NMe <sub>2</sub>        | 658                    | 0.015    | 0.447  | 3.36×10 <sup>4</sup> | 13   |
| Cu <sub>8</sub> (12-C≡C-closo-CB <sub>11</sub> H <sub>11</sub> ) <sub>4</sub> (Py) <sub>8</sub>                                                                                                                        | 12-C≡C-closo-CB <sub>11</sub> H <sub>19</sub>                            | 650                    | 0.130    | 5.43   | 2.39×10 <sup>4</sup> | 10   |
| [(TripC≡C)Cu] <sub>8</sub>                                                                                                                                                                                             | 2,4,6-iPr <sub>3</sub> -C <sub>6</sub> H <sub>2</sub>                    | 599                    | 0.210    | 10.40  | 2.02×10 <sup>4</sup> | 14   |
| Cu <sub>3</sub> (3,5-lutidine) <sub>3</sub> [Cu <sub>7</sub> (12-C≡C-closo-CB <sub>11</sub> H <sub>11</sub> ) <sub>4</sub> (3,5-lutidine) <sub>8</sub> ]                                                               | 12-C≡C-closo-CB <sub>11</sub> H <sub>18</sub>                            | 580                    | 0.100    | 5.24   | 1.91×10 <sup>4</sup> | 10   |
| [Cu <sub>6</sub> (C <sub>2</sub> Ph) <sub>4</sub> {(PPh <sub>2</sub> ) <sub>3</sub> CH} <sub>2</sub> ](PF <sub>6</sub> ) <sub>2</sub>                                                                                  | C <sub>2</sub> -4-C <sub>6</sub> H <sub>5</sub>                          | 615                    | 0.165    | 11.48  | 1.44×10 <sup>4</sup> | 13   |
| Cu <sub>4</sub> (12-C≡C-closo-CB <sub>11</sub> H <sub>11</sub> ) <sub>2</sub> (PPh <sub>3</sub> ) <sub>4</sub>                                                                                                         | 12-C≡C-closo-CB <sub>11</sub> H <sub>16</sub>                            | 494                    | 0.990    | 75.64  | 1.31×10 <sup>4</sup> | 10   |
| [Cu <sub>6</sub> (C <sub>2</sub> C <sub>6</sub> H <sub>4</sub> OMe) <sub>4</sub> {(PPh <sub>2</sub> ) <sub>3</sub> CH} <sub>2</sub> ](PF <sub>6</sub> ) <sub>2</sub>                                                   | C <sub>2</sub> -4-C <sub>6</sub> H <sub>4</sub> -OMe                     | 621                    | 0.041    | 3.175  | 1.29×10 <sup>4</sup> | 13   |
| [Cu <sub>6</sub> (C <sub>2</sub> C <sub>6</sub> H <sub>4</sub> Ph) <sub>4</sub> {(PPh <sub>2</sub> ) <sub>3</sub> CH} <sub>2</sub> ](PF <sub>6</sub> ) <sub>2</sub>                                                    | C <sub>2</sub> -4-C <sub>6</sub> H <sub>4</sub> -Ph                      | 624                    | 0.075    | 6.80   | 1.10×10 <sup>4</sup> | 13   |
| Cu(PPh <sub>3</sub> ) <sub>3</sub> [Cu <sub>3</sub> (12-C≡C-closo-CB <sub>11</sub> H <sub>11</sub> ) <sub>2</sub> (PPh <sub>3</sub> ) <sub>4</sub> ]                                                                   | 12-C≡C-closo-CB <sub>11</sub> H <sub>15</sub>                            | 490                    | 0.570    | 51.95  | 1.10×10 <sup>4</sup> | 10   |
| Cu <sub>4</sub> (12-C≡C-closo-CB <sub>11</sub> H <sub>11</sub> ) <sub>2</sub> (PiPr <sub>3</sub> ) <sub>4</sub>                                                                                                        | 12-C≡C-closo-CB <sub>11</sub> H <sub>12</sub>                            | 512                    | 0.990    | 98.00  | 1.01×10 <sup>4</sup> | 10   |
| [Cu <sub>6</sub> (C <sub>2</sub> C <sub>5</sub> H <sub>4</sub> N) <sub>4</sub> {(PPh <sub>2</sub> ) <sub>3</sub> CH} <sub>2</sub> ](PF <sub>6</sub> ) <sub>2</sub>                                                     | C <sub>2</sub> C <sub>5</sub> H <sub>4</sub> N                           | 508                    | 0.037    | 4.695  | 7.88×10 <sup>3</sup> | 13   |
| Cu <sub>4</sub> (12-C≡C-closo-CB <sub>11</sub> H <sub>11</sub> ) <sub>2</sub> (PCy <sub>3</sub> ) <sub>4</sub>                                                                                                         | 12-C≡C-closo-CB <sub>11</sub> H <sub>14</sub>                            | 509                    | 0.800    | 105.20 | 7.60×10 <sup>3</sup> | 10   |
| [Cu <sub>6</sub> (C <sub>2</sub> C <sub>6</sub> H <sub>4</sub> CF <sub>3</sub> ) <sub>4</sub> {(PPh <sub>2</sub> ) <sub>3</sub> CH} <sub>2</sub> ](PF <sub>6</sub> ) <sub>2</sub>                                      | C <sub>2</sub> -4-C <sub>6</sub> H <sub>4</sub> -CF <sub>3</sub>         | 579                    | 0.117    | 17.80  | 6.57×10 <sup>3</sup> | 13   |
| Cu(PMe <sub>3</sub> ) <sub>4</sub> ] <sub>2</sub> [Cu <sub>6</sub> (12-C≡C-closo-CB <sub>11</sub> H <sub>11</sub> ) <sub>4</sub> (PMe <sub>3</sub> ) <sub>5</sub> ]                                                    | 12-C≡C-closo-CB <sub>11</sub> H <sub>17</sub>                            | 640                    | 0.030    | 7.00   | 4.29×10 <sup>3</sup> | 10   |
| R/S-Cu <sub>14</sub>                                                                                                                                                                                                   | (R/S)-2diphenyl-2-hydroxymethylpyrrolidine-1-propyne                     | 726                    | 0.082    | 61.15  | 1.34×10 <sup>3</sup> | 15   |
| Cu <sub>3</sub> I <sub>6</sub>                                                                                                                                                                                         | non                                                                      | 548                    | 0.120    | 1580   | 7.59                 | 16   |

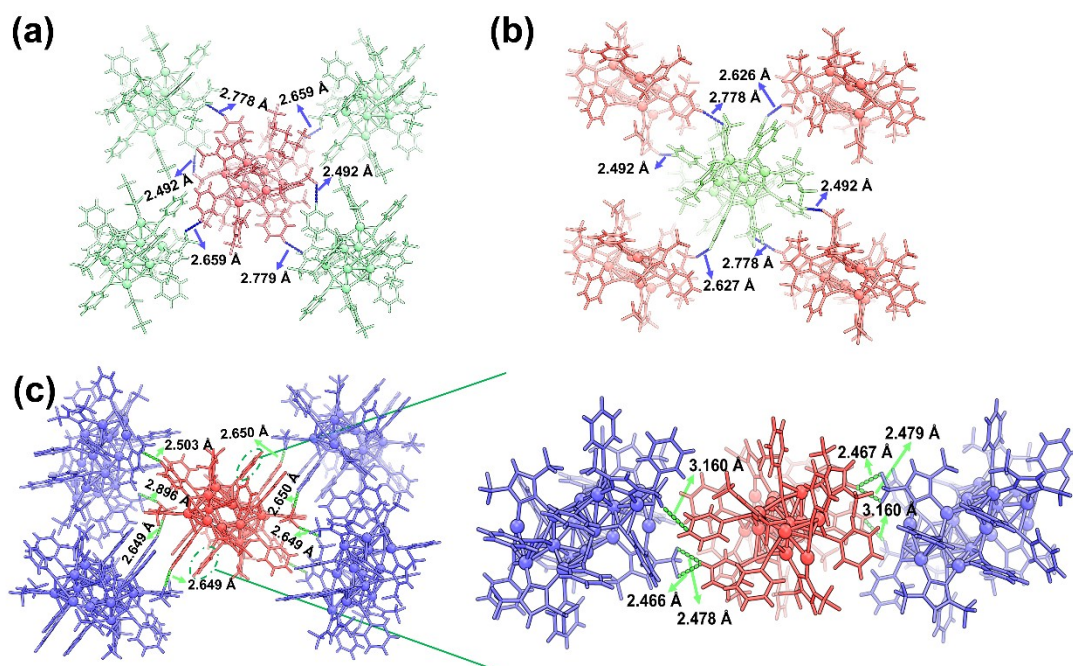

Fig. S17 Hydrogen bonding interactions in  $\text{Cu}_{10}$ -a (a),  $\text{Cu}_{10}$ -b (b), and  $\text{Cu}_{18}$  (c) (d).

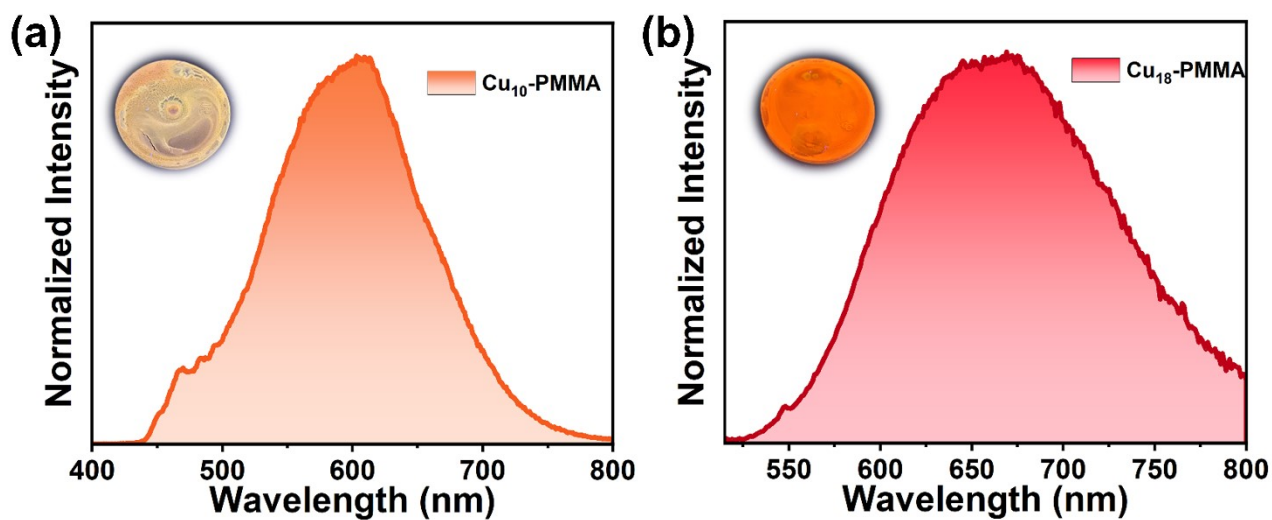

Fig. S18 Solid-state emission of polymethyl methacrylate film with 15% weight of  $\text{Cu}_{10}$  (a) and  $\text{Cu}_{18}$  (b).



## Computational detail

To figure out the absorption and emission, density functional theory (DFT) and time-dependent DFT (TD-DFT) were performed. For detail, geometry optimization at the ground state was carried out by DFT utilizing the AMS2018 program<sup>17, 18</sup> with the B3LYP-DJ<sup>19</sup> function and triple zeta polarization (TZP) basis set.<sup>20</sup> Crystal structures were used as the initial guess for geometry optimization. Kohn-Sham orbitals were obtained by Gaussian16 package<sup>21</sup> under the level of PBE function in conjunction with Def2-SVP basis set,<sup>22</sup> and their maps and population analysis were conducted by Multiwfn 3.8,<sup>23</sup> followed by visualized via VMD 1.9.3 program.<sup>24</sup> To assign the electronic transition, TD-DFT was performed through the AMS2018 program and the first 1500 singlets of optimized geometry ( $S_0$ ) were calculated using TD-DFT+TB (tight-binding) formalism for linear response, to simulate absorption spectra at an affordable computational cost.<sup>25</sup> All the calculations in the AMS2018 program are treated with ZORA Hamiltonian for scalar relativistic effects.<sup>26-28</sup>

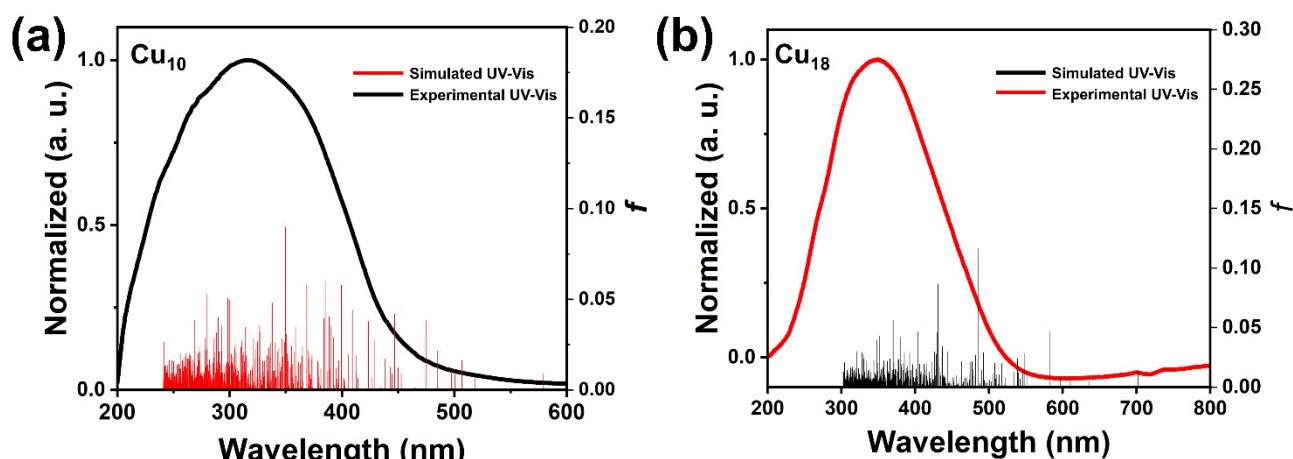

Fig. S19 The comparison between experimental solid-state UV-vis spectra with simulated UV-vis of  $\text{Cu}_{10}$  (a) and  $\text{Cu}_{18}$  (b).

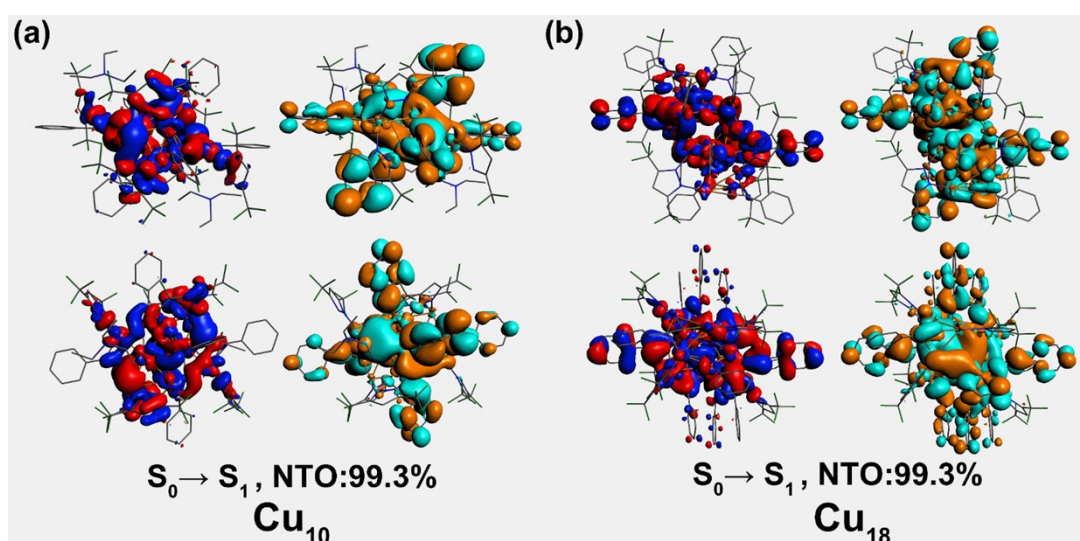

Fig. S20 Natural transition orbitals (NTOs) for  $S_0$  to  $S_1$  of  $\text{Cu}_{10}$  (a) and  $\text{Cu}_{18}$  (b) (isovalue = 0.01 a.u., upper: side view, bottom: top view).

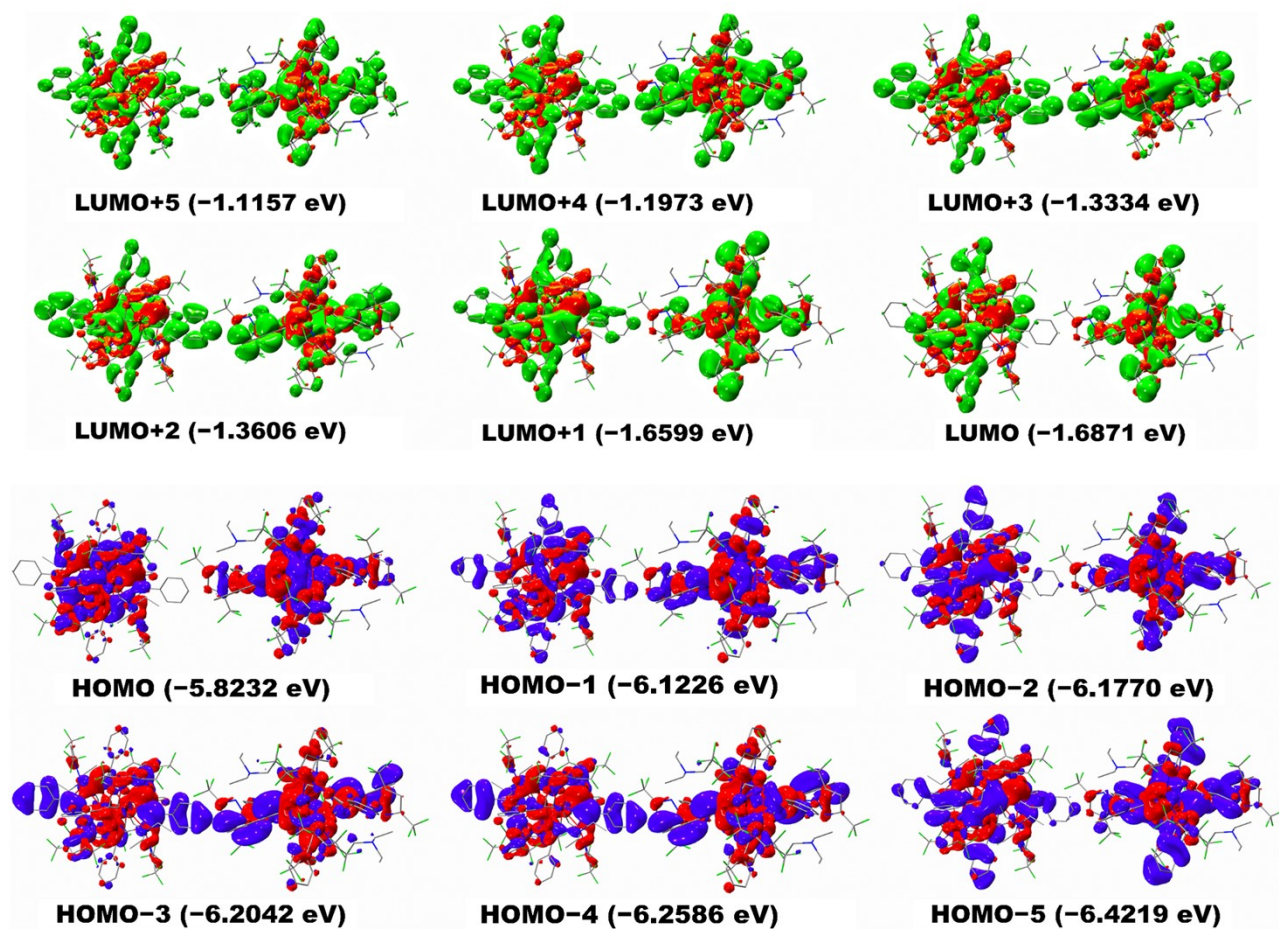

Fig. S21. Frontier molecular orbitals of  $\text{Cu}_{10}$  (isovalue = 0.01 a.u., left: side view, right: top view).

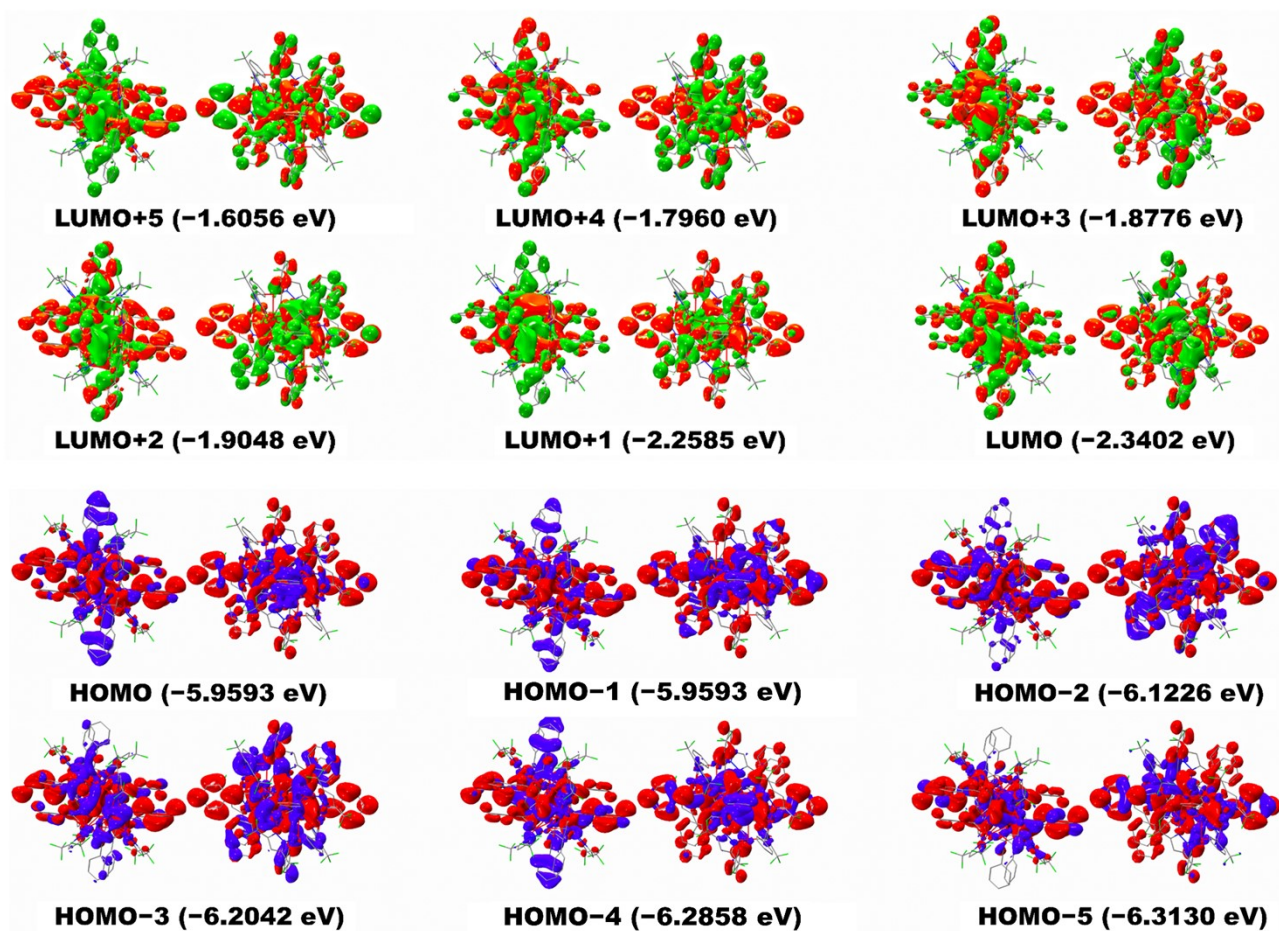

Fig. S22. Frontier molecular orbitals of  $\text{Cu}_{18}$  (isovalue = 0.01 a.u., left: side view, right: top view).

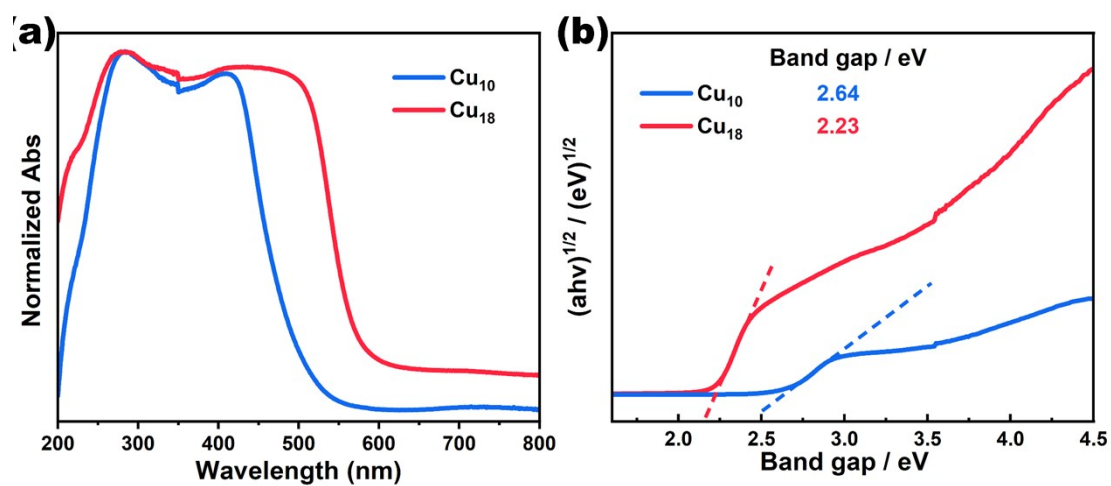

Fig. S23. Solid-state V-Vis diffuse reflectance spectroscopies (a) and corresponding band gaps (b) of  $\text{Cu}_{10}$  and  $\text{Cu}_{18}$ .

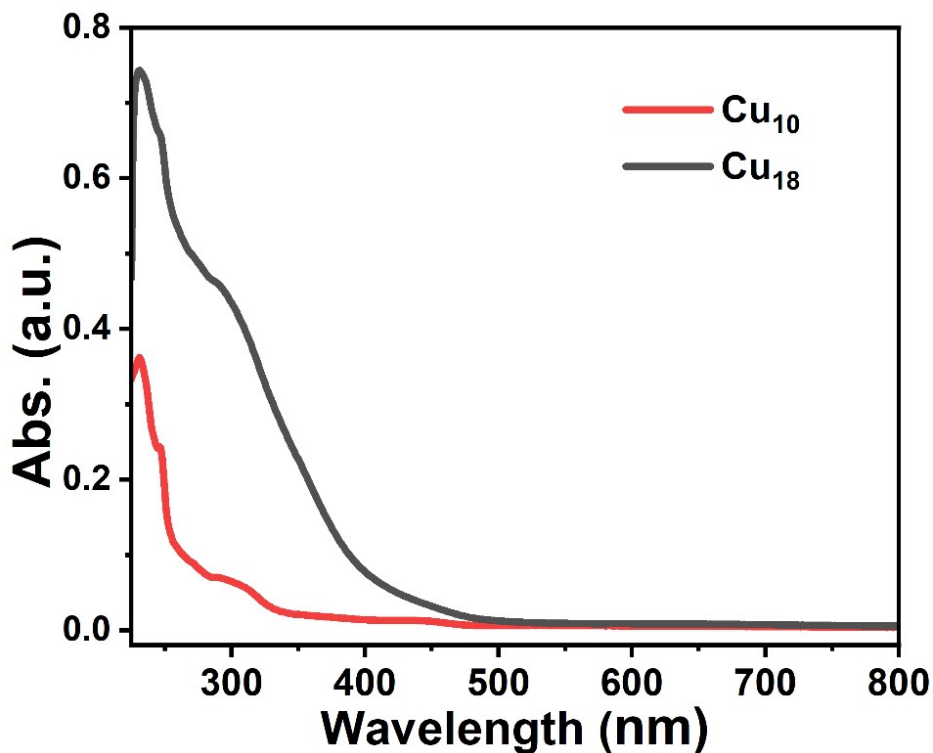

**Fig. S24.** The UV-vis spectra of  $\text{Cu}_{10}$  and  $\text{Cu}_{18}$  in  $\text{CH}_2\text{Cl}_2$  (cluster concentration:  $6.7 \times 10^{-6}$  mol  $\text{L}^{-1}$ ).

**Table S6.** Selected bond length ( $\text{\AA}$ ) and bond angles ( $^\circ$ ) of  $\text{Cu}_{10}$ .

|                       |            |                    |          |                         |          |
|-----------------------|------------|--------------------|----------|-------------------------|----------|
| Cu(7)-Cu(6)           | 3.0361(14) | Cu(3)-N(2)         | 1.996(6) | Cu(1)-C(39)#2           | 2.124(7) |
| Cu(8)-Cu(9)#1         | 2.9964(14) | Cu(7)-N(9)         | 1.994(6) | Cu(1)-C(31)#2           | 2.118(7) |
| Cu(9)-Cu(6)           | 2.9790(13) | Cu(7)-N(8)         | 1.988(5) | Cu(6)-C(76)#1           | 2.118(6) |
| Cu(4)-Cu(2)#2         | 2.9667(14) | Cu(8)-N(10)        | 1.984(6) | Cu(8)-C(84)#1           | 2.080(7) |
| Cu(3)-Cu(2)           | 2.9515(13) | Cu(3)-N(4)         | 1.984(6) | Cu(2)-C(38)#2           | 2.078(7) |
| Cu(9)-Cu(9)#1         | 2.9423(19) | Cu(2)-N(3)         | 1.973(6) | Cu(2)-C(39)#2           | 2.077(6) |
| Cu(8)-Cu(7)           | 2.9102(13) | Cu(6)-N(7)         | 1.971(6) | Cu(5)-C(22)             | 2.074(7) |
| Cu(8)-Cu(6)           | 2.7406(14) | Cu(1)-N(1)         | 1.962(6) | Cu(2)-C(31)             | 2.068(7) |
| Cu(4)-Cu(2)           | 2.7318(13) | Cu(10)-N(12)       | 1.939(6) | Cu(8)-C(83)#1           | 2.053(6) |
| Cu(9)-Cu(6)#1         | 2.7138(13) | Cu(5)-N(5)         | 1.934(6) | Cu(8)-C(76)             | 2.046(6) |
| Cu(1)-Cu(4)#2         | 2.7026(14) | Cu(1)-C(30)#2      | 2.297(7) | Cu(10)-C(67)            | 2.029(6) |
| Cu(8)-Cu(9)           | 2.6990(13) | Cu(6)-C(83)#1      | 2.241(7) | Cu(5)-C(23)             | 2.027(7) |
| Cu(9)-Cu(7)           | 2.6850(14) | Cu(4)-C(39)        | 2.209(7) | Cu(9)-C(68)             | 2.017(7) |
| Cu(3)-Cu(4)           | 2.6754(14) | Cu(9)-C(84)        | 2.196(7) | Cu(4)-C(23)             | 2.013(7) |
| Cu(1)-Cu(2)           | 2.6706(14) | Cu(6)-C(75)#1      | 2.189(7) | Cu(10)-C(68)            | 2.013(6) |
| Cu(5)-Cu(4)           | 2.5029(13) | Cu(6)-C(84)#1      | 2.170(7) | Cu(5)-C(39)             | 1.996(6) |
| Cu(9)-C(76)           | 1.988(6)   | Cu(10)-C(84)       | 1.985(7) | Cu(4)-C(31)             | 1.979(7) |
| Cu(3)-C(23)           | 1.974(7)   | Cu(7)-C(68)        | 1.955(6) | CA8:A59(23)-Cu(4)-Cu(2) | 113.2(2) |
| Cu(1)#2-Cu(4)-Cu(2)   | 97.02(4)   | N(1)-Cu(1)-C(30)#2 | 95.2(2)  | C(23)-Cu(4)-Cu(2)#2     | 119.6(2) |
| Cu(1)#2-Cu(4)-Cu(2)#2 | 55.97(3)   | N(1)-Cu(1)-C(31)#2 | 126.2(3) | C(23)-Cu(4)-Cu(3)       | 47.2(2)  |
| Cu(1)-Cu(2)-Cu(3)     | 67.63(4)   | N(1)-Cu(1)-C(38)#2 | 100.6(3) | C(23)-Cu(4)-Cu(5)       | 52.0(2)  |
| Cu(1)-Cu(2)-Cu(4)     | 71.78(4)   | N(1)-Cu(1)-C(39)#2 | 134.7(3) | C(23)-Cu(5)-C(22)       | 35.3(3)  |

|                       |           |                     |            |                       |            |
|-----------------------|-----------|---------------------|------------|-----------------------|------------|
| Cu(1)-Cu(2)-Cu(4)#2   | 57.00(3)  | N(1)-Cu(1)-Cu(2)    | 113.89(18) | C(23)-Cu(5)-Cu(4)     | 51.47(19)  |
| Cu(10)-Cu(9)-Cu(6)    | 127.14(5) | N(1)-Cu(1)-Cu(4)#2  | 171.54(18) | C(30)#2-Cu(1)-Cu(2)   | 124.93(18) |
| Cu(10)-Cu(9)-Cu(6)#1  | 96.66(4)  | N(10)-Cu(8)-C(83)#1 | 113.8(3)   | C(30)#2-Cu(1)-Cu(4)#2 | 78.14(18)  |
| Cu(10)-Cu(9)-Cu(7)    | 97.80(4)  | N(10)-Cu(8)-C(84)#1 | 148.4(3)   | C(31)#2-Cu(1)-C(30)#2 | 31.9(3)    |
| Cu(10)-Cu(9)-Cu(8)    | 159.90(5) | N(10)-Cu(8)-Cu(6)   | 126.69(17) | C(31)#2-Cu(1)-C(38)#2 | 132.9(3)   |
| Cu(10)-Cu(9)-Cu(8)#1  | 81.92(4)  | N(10)-Cu(8)-Cu(7)   | 66.76(16)  | C(31)#2-Cu(1)-C(39)#2 | 99.1(3)    |
| Cu(10)-Cu(9)-Cu(9)#1  | 135.91(6) | N(10)-Cu(8)-Cu(9)   | 103.87(17) | C(31)#2-Cu(1)-Cu(2)   | 99.83(19)  |
| Cu(2)-Cu(1)-Cu(4)#2   | 67.02(4)  | N(10)-Cu(8)-Cu(9)#1 | 164.28(17) | C(31)#2-Cu(1)-Cu(4)#2 | 46.54(18)  |
| Cu(2)-Cu(4)-Cu(2)#2   | 113.13(4) | N(12)-Cu(10)-C(67)  | 111.3(3)   | C(31)-Cu(2)-C(38)#2   | 144.2(3)   |
| Cu(3)-Cu(2)-Cu(4)#2   | 109.19(4) | N(12)-Cu(10)-C(68)  | 146.6(3)   | C(31)-Cu(2)-C(39)#2   | 109.0(3)   |
| Cu(3)-Cu(4)-Cu(1)#2   | 159.67(5) | N(12)-Cu(10)-C(84)  | 104.3(3)   | C(31)-Cu(2)-Cu(1)     | 105.78(19) |
| Cu(3)-Cu(4)-Cu(2)     | 66.16(4)  | N(12)-Cu(10)-Cu(9)  | 156.19(18) | C(31)-Cu(2)-Cu(3)     | 97.43(18)  |
| Cu(3)-Cu(4)-Cu(2)#2   | 139.80(5) | N(2)-Cu(3)-Cu(2)    | 107.12(17) | C(31)-Cu(2)-Cu(4)     | 46.18(18)  |
| Cu(4)-Cu(2)-Cu(3)     | 56.00(3)  | N(2)-Cu(3)-Cu(4)    | 117.94(17) | C(31)-Cu(2)-Cu(4)#2   | 63.17(19)  |
| Cu(4)-Cu(2)-Cu(4)#2   | 66.87(4)  | N(3)-Cu(2)-C(31)    | 107.2(3)   | C(31)-Cu(4)-C(23)     | 146.1(3)   |
| Cu(4)-Cu(3)-Cu(2)     | 57.84(3)  | N(3)-Cu(2)-C(38)#2  | 108.7(3)   | C(31)-Cu(4)-C(39)     | 100.7(3)   |
| Cu(5)-Cu(4)-Cu(1)#2   | 95.69(4)  | N(3)-Cu(2)-C(39)#2  | 142.6(3)   | C(31)-Cu(4)-Cu(1)#2   | 51.0(2)    |
| Cu(5)-Cu(4)-Cu(2)     | 163.62(5) | N(3)-Cu(2)-Cu(1)    | 125.23(18) | C(31)-Cu(4)-Cu(2)     | 48.9(2)    |
| Cu(5)-Cu(4)-Cu(2)#2   | 82.63(4)  | N(3)-Cu(2)-Cu(3)    | 65.74(17)  | C(31)-Cu(4)-Cu(2)#2   | 94.1(2)    |
| Cu(5)-Cu(4)-Cu(3)     | 99.15(4)  | N(3)-Cu(2)-Cu(4)    | 103.05(17) | C(31)-Cu(4)-Cu(3)     | 109.2(2)   |
| Cu(6)#1-Cu(9)-Cu(6)   | 117.97(4) | N(3)-Cu(2)-Cu(4)#2  | 169.12(18) | C(31)-Cu(4)-Cu(5)     | 138.0(2)   |
| Cu(6)#1-Cu(9)-Cu(8)#1 | 57.10(3)  | N(4)-Cu(3)-Cu(2)    | 66.84(16)  | C(38)#2-Cu(1)-C(30)#2 | 164.1(3)   |
| Cu(6)#1-Cu(9)-Cu(9)#1 | 63.41(4)  | N(4)-Cu(3)-Cu(4)    | 102.63(18) | C(38)#2-Cu(1)-Cu(2)   | 49.57(18)  |
| Cu(6)-Cu(8)-Cu(7)     | 64.92(3)  | N(4)-Cu(3)-N(2)     | 127.4(3)   | C(38)#2-Cu(1)-Cu(4)#2 | 86.35(19)  |
| Cu(6)-Cu(8)-Cu(9)#1   | 56.25(3)  | N(5)-Cu(5)-C(22)    | 111.2(3)   | C(38)#2-Cu(2)-Cu(1)   | 52.43(18)  |
| Cu(6)-Cu(9)-Cu(8)#1   | 85.12(4)  | N(5)-Cu(5)-C(23)    | 145.6(3)   | C(38)#2-Cu(2)-Cu(3)   | 98.12(18)  |
| Cu(7)-Cu(8)-Cu(9)#1   | 106.83(4) | N(5)-Cu(5)-C(39)    | 105.1(3)   | C(38)#2-Cu(2)-Cu(4)   | 124.20(19) |
| Cu(7)-Cu(9)-Cu(6)     | 64.59(3)  | N(5)-Cu(5)-Cu(4)    | 157.65(18) | C(38)#2-Cu(2)-Cu(4)#2 | 81.24(19)  |
| Cu(7)-Cu(9)-Cu(6)#1   | 157.86(5) | N(7)-Cu(6)-C(75)#1  | 103.0(2)   | C(39)#2-Cu(1)-C(30)#2 | 129.6(3)   |
| Cu(7)-Cu(9)-Cu(8)     | 65.44(4)  | N(7)-Cu(6)-C(76)#1  | 135.7(2)   | C(39)#2-Cu(1)-C(38)#2 | 34.5(3)    |
| Cu(7)-Cu(9)-Cu(8)#1   | 141.87(5) | N(7)-Cu(6)-C(83)#1  | 93.3(2)    | C(39)#2-Cu(1)-Cu(2)   | 49.76(18)  |
| Cu(7)-Cu(9)-Cu(9)#1   | 114.82(5) | N(7)-Cu(6)-C(84)#1  | 126.3(2)   | C(39)#2-Cu(1)-Cu(4)#2 | 52.84(19)  |
| Cu(8)-Cu(6)-Cu(7)     | 60.24(3)  | N(7)-Cu(6)-Cu(7)    | 64.51(17)  | C(39)#2-Cu(2)-C(38)#2 | 35.6(3)    |
| Cu(8)-Cu(6)-Cu(9)     | 56.13(3)  | N(7)-Cu(6)-Cu(8)    | 108.66(18) | C(39)#2-Cu(2)-Cu(1)   | 51.30(18)  |
| Cu(8)-Cu(7)-Cu(6)     | 54.84(3)  | N(7)-Cu(6)-Cu(9)    | 114.47(17) | C(39)#2-Cu(2)-Cu(3)   | 117.60(19) |
| Cu(8)-Cu(9)-Cu(6)     | 57.47(3)  | N(7)-Cu(6)-Cu(9)#1  | 175.09(18) | C(39)#2-Cu(2)-Cu(4)   | 108.47(19) |
| Cu(8)-Cu(9)-Cu(6)#1   | 96.61(4)  | N(8)-Cu(7)-Cu(6)    | 64.76(16)  | C(39)#2-Cu(2)-Cu(4)#2 | 48.06(19)  |
| Cu(8)-Cu(9)-Cu(8)#1   | 118.05(4) | N(8)-Cu(7)-Cu(8)    | 102.72(16) | C(39)-Cu(4)-Cu(1)#2   | 50.00(17)  |
| Cu(8)-Cu(9)-Cu(9)#1   | 64.00(4)  | N(8)-Cu(7)-Cu(9)    | 124.65(17) | C(39)-Cu(4)-Cu(2)     | 145.64(17) |
| Cu(9)#1-Cu(6)-Cu(7)   | 111.04(4) | N(8)-Cu(7)-N(9)     | 117.7(2)   | C(39)-Cu(4)-Cu(2)#2   | 44.39(16)  |
| Cu(9)#1-Cu(6)-Cu(8)   | 66.64(4)  | N(9)-Cu(7)-Cu(6)    | 119.34(16) | C(39)-Cu(4)-Cu(3)     | 148.14(17) |
| Cu(9)#1-Cu(6)-Cu(9)   | 62.04(4)  | N(9)-Cu(7)-Cu(8)    | 67.22(16)  | C(39)-Cu(4)-Cu(5)     | 49.65(16)  |
| Cu(9)#1-Cu(9)-Cu(6)   | 54.55(3)  | N(9)-Cu(7)-Cu(9)    | 101.67(16) | C(39)-Cu(5)-C(22)     | 143.6(3)   |
| Cu(9)#1-Cu(9)-Cu(8)#1 | 54.05(4)  | C(22)-Cu(5)-Cu(4)   | 86.73(19)  | C(39)-Cu(5)-C(23)     | 108.4(3)   |

|                       |            |                       |            |                       |            |
|-----------------------|------------|-----------------------|------------|-----------------------|------------|
| Cu(9)-Cu(6)-Cu(7)     | 53.01(3)   | C(23)-Cu(3)-Cu(2)     | 106.2(2)   | C(39)-Cu(5)-Cu(4)     | 57.50(19)  |
| Cu(9)-Cu(7)-Cu(6)     | 62.40(3)   | C(23)-Cu(3)-Cu(4)     | 48.5(2)    | C(67)-Cu(10)-Cu(9)    | 88.08(18)  |
| Cu(9)-Cu(7)-Cu(8)     | 57.51(3)   | C(23)-Cu(3)-N(2)      | 109.3(3)   | C(68)-Cu(10)-C(67)    | 36.3(3)    |
| Cu(9)-Cu(8)-Cu(6)     | 66.41(4)   | C(23)-Cu(3)-N(4)      | 122.8(3)   | C(68)-Cu(10)-Cu(9)    | 51.89(19)  |
| Cu(9)-Cu(8)-Cu(7)     | 57.05(3)   | C(23)-Cu(4)-C(39)     | 101.1(3)   | C(68)-Cu(7)-Cu(6)     | 91.33(19)  |
| Cu(9)-Cu(8)-Cu(9)#1   | 61.95(4)   | C(23)-Cu(4)-Cu(1)#2   | 145.9(2)   | C(68)-Cu(7)-Cu(8)     | 105.87(19) |
| C(68)-Cu(7)-Cu(9)     | 48.45(19)  | C(76)-Cu(8)-C(83)#1   | 141.2(3)   | C(83)#1-Cu(8)-Cu(9)#1 | 80.69(19)  |
| C(68)-Cu(7)-N(8)      | 119.7(3)   | C(76)-Cu(8)-C(84)#1   | 105.8(3)   | C(84)#1-Cu(6)-C(75)#1 | 129.1(3)   |
| C(68)-Cu(7)-N(9)      | 122.2(2)   | C(76)-Cu(8)-Cu(6)     | 103.06(19) | C(84)#1-Cu(6)-C(83)#1 | 33.4(2)    |
| C(68)-Cu(9)-C(84)     | 100.6(3)   | C(76)-Cu(8)-Cu(7)     | 98.57(18)  | C(84)#1-Cu(6)-Cu(7)   | 107.62(18) |
| C(68)-Cu(9)-Cu(10)    | 51.76(18)  | C(76)-Cu(8)-Cu(9)     | 47.10(18)  | C(84)#1-Cu(6)-Cu(8)   | 48.43(18)  |
| C(68)-Cu(9)-Cu(6)     | 91.79(18)  | C(76)-Cu(8)-Cu(9)#1   | 60.79(19)  | C(84)#1-Cu(6)-Cu(9)   | 91.75(17)  |
| C(68)-Cu(9)-Cu(6)#1   | 147.21(18) | C(76)-Cu(9)-C(68)     | 144.5(3)   | C(84)#1-Cu(6)-Cu(9)#1 | 52.00(18)  |
| C(68)-Cu(9)-Cu(7)     | 46.51(18)  | C(76)-Cu(9)-C(84)     | 101.1(2)   | C(84)#1-Cu(8)-Cu(6)   | 51.31(18)  |
| C(68)-Cu(9)-Cu(8)     | 111.85(19) | C(76)-Cu(9)-Cu(10)    | 135.62(18) | C(84)#1-Cu(8)-Cu(7)   | 115.01(19) |
| C(68)-Cu(9)-Cu(8)#1   | 117.2(2)   | C(76)-Cu(9)-Cu(6)     | 96.80(18)  | C(84)#1-Cu(8)-Cu(9)   | 102.17(19) |
| C(68)-Cu(9)-Cu(9)#1   | 143.81(19) | C(76)-Cu(9)-Cu(6)#1   | 50.72(18)  | C(84)#1-Cu(8)-Cu(9)#1 | 47.12(19)  |
| C(75)#1-Cu(6)-C(83)#1 | 162.0(2)   | C(76)-Cu(9)-Cu(7)     | 107.82(19) | C(84)-Cu(10)-C(67)    | 144.4(3)   |
| C(75)#1-Cu(6)-Cu(7)   | 104.20(18) | C(76)-Cu(9)-Cu(8)     | 48.93(18)  | C(84)-Cu(10)-C(68)    | 108.4(3)   |
| C(75)#1-Cu(6)-Cu(8)   | 130.89(19) | C(76)-Cu(9)-Cu(8)#1   | 97.82(19)  | C(84)-Cu(10)-Cu(9)    | 57.45(19)  |
| C(75)#1-Cu(6)-Cu(9)   | 76.97(18)  | C(76)-Cu(9)-Cu(9)#1   | 62.35(19)  | C(84)-Cu(9)-Cu(10)    | 49.62(17)  |
| C(75)#1-Cu(6)-Cu(9)#1 | 79.89(18)  | C(83)#1-Cu(6)-Cu(7)   | 89.66(17)  | C(84)-Cu(9)-Cu(6)     | 127.56(18) |
| C(76)#1-Cu(6)-C(75)#1 | 33.6(3)    | C(83)#1-Cu(6)-Cu(8)   | 47.38(17)  | C(84)-Cu(9)-Cu(6)#1   | 51.14(18)  |
| C(76)#1-Cu(6)-C(83)#1 | 130.9(2)   | C(83)#1-Cu(6)-Cu(9)   | 103.41(17) | C(84)-Cu(9)-Cu(7)     | 147.12(18) |
| C(76)#1-Cu(6)-C(84)#1 | 97.9(3)    | C(83)#1-Cu(6)-Cu(9)#1 | 84.42(17)  | C(84)-Cu(9)-Cu(8)     | 147.27(18) |
| C(76)#1-Cu(6)-Cu(7)   | 108.37(18) | C(83)#1-Cu(8)-C(84)#1 | 35.8(3)    | C(84)-Cu(9)-Cu(8)#1   | 43.96(17)  |
| C(76)#1-Cu(6)-Cu(8)   | 102.73(18) | C(83)#1-Cu(8)-Cu(6)   | 53.44(18)  | C(84)-Cu(9)-Cu(9)#1   | 92.22(18)  |
| C(76)#1-Cu(6)-Cu(9)   | 60.68(18)  | C(83)#1-Cu(8)-Cu(7)   | 97.08(18)  | C(83)#1-Cu(8)-Cu(9)   | 119.71(19) |
| C(76)#1-Cu(6)-Cu(9)#1 | 46.61(18)  |                       |            |                       |            |

Symmetry transformations used to generate equivalent atoms:

#1 -x+1,-y+1,-z+1    #2 -x+1,-y+1,-z

**Table S7.** Selected bond length (Å) and bond angles (°) of **Cu<sub>18</sub>**.

|               |            |             |          |               |          |
|---------------|------------|-------------|----------|---------------|----------|
| Cu(8)-Cu(6)   | 2.9923(14) | Cu(6)-N(1)  | 2.017(6) | Cu(4)-C(9)    | 1.986(7) |
| Cu(5)-Cu(1)   | 2.9252(13) | Cu(3)-N(3)  | 1.972(6) | Cu(5)-C(41)   | 2.111(7) |
| Cu(7)-Cu(8)#1 | 2.8718(15) | Cu(5)-N(5)  | 1.972(5) | Cu(5)-C(42)   | 2.055(6) |
| Cu(2)-Cu(1)   | 2.8412(15) | Cu(9)-N(6)  | 1.971(6) | Cu(5)-C(54)   | 2.434(7) |
| Cu(9)-Cu(8)   | 2.7335(13) | Cu(2)-N(4)  | 1.958(6) | Cu(5)-C(55)   | 2.191(6) |
| Cu(7)-Cu(3)#1 | 2.7302(14) | Cu(1)-N(2)  | 1.891(6) | Cu(6)-C(8)    | 2.031(7) |
| Cu(4)-Cu(8)   | 2.7174(13) | Cu(1)-C(42) | 1.852(7) | Cu(6)-C(9)    | 2.141(7) |
| Cu(4)-Cu(7)#1 | 2.7096(14) | Cu(2)-C(10) | 2.509(7) | Cu(7)-C(29)#1 | 2.428(9) |
| Cu(4)-Cu(9)   | 2.7056(12) | Cu(2)-C(41) | 2.255(7) | Cu(7)-C(56)   | 1.919(7) |
| Cu(4)-Cu(2)   | 2.7018(13) | Cu(2)-C(42) | 2.023(7) | Cu(7)-C(8)    | 1.934(7) |

|                       |            |                    |            |                       |            |
|-----------------------|------------|--------------------|------------|-----------------------|------------|
| Cu(7)-Cu(9)#1         | 2.6884(13) | Cu(2)-C(9)         | 2.316(6)   | Cu(8)-C(55)           | 2.042(7)   |
| Cu(4)-Cu(5)           | 2.6625(13) | Cu(3)-C(29)        | 2.182(12)  | Cu(8)-C(56)           | 2.035(7)   |
| Cu(4)-Cu(3)           | 2.6406(14) | Cu(3)-C(56)#1      | 2.047(6)   | Cu(8)-C(7)#1          | 2.380(7)   |
| Cu(7)-Cu(6)           | 2.5600(13) | Cu(3)-C(57)#1      | 2.119(7)   | Cu(8)-C(8)#1          | 2.175(7)   |
| Cu(4)-Cu(6)           | 2.5263(13) | Cu(4)-C(29)        | 2.000(12)  | Cu(9)-C(29)           | 2.129(15)  |
| Cu(7)-Cu(8)           | 2.4905(13) | Cu(4)-C(55)        | 1.993(7)   | Cu(9)-C(7)#1          | 2.074(7)   |
| Cu(9)-C(8)#1          | 2.128(6)   | N(1)-Cu(6)-C(8)    | 117.4(2)   | C(10)-Cu(2)-Cu(1)     | 69.76(17)  |
| Cu(2)-Cu(1)-Cu(5)     | 66.21(4)   | N(1)-Cu(6)-C(9)    | 107.7(3)   | C(10)-Cu(2)-Cu(4)     | 74.76(15)  |
| Cu(2)-Cu(4)-Cu(7)#1   | 133.06(5)  | N(1)-Cu(6)-Cu(4)   | 125.90(16) | C(29)#1-Cu(7)-Cu(3)#1 | 49.6(3)    |
| Cu(2)-Cu(4)-Cu(8)     | 162.95(5)  | N(1)-Cu(6)-Cu(7)   | 109.16(17) | C(29)#1-Cu(7)-Cu(4)#1 | 45.4(3)    |
| Cu(2)-Cu(4)-Cu(9)     | 122.92(4)  | N(1)-Cu(6)-Cu(8)   | 120.82(18) | C(29)#1-Cu(7)-Cu(6)   | 149.5(3)   |
| Cu(3)#1-Cu(7)-Cu(8)#1 | 115.18(4)  | N(2)-Cu(1)-Cu(2)   | 139.8(2)   | C(29)#1-Cu(7)-Cu(8)   | 135.9(2)   |
| Cu(3)-Cu(4)-Cu(2)     | 72.94(4)   | N(2)-Cu(1)-Cu(5)   | 133.9(2)   | C(29)#1-Cu(7)-Cu(8)#1 | 90.9(4)    |
| Cu(3)-Cu(4)-Cu(5)     | 132.22(4)  | N(3)-Cu(3)-C(29)   | 100.8(4)   | C(29)#1-Cu(7)-Cu(9)#1 | 48.8(3)    |
| Cu(3)-Cu(4)-Cu(7)#1   | 61.35(4)   | N(3)-Cu(3)-C(56)#1 | 151.6(3)   | C(29)-Cu(3)-Cu(4)     | 47.9(3)    |
| Cu(3)-Cu(4)-Cu(8)     | 123.96(5)  | N(3)-Cu(3)-C(57)#1 | 117.6(3)   | C(29)-Cu(3)-Cu(7)#1   | 58.0(3)    |
| Cu(3)-Cu(4)-Cu(9)     | 99.57(5)   | N(3)-Cu(3)-Cu(4)   | 114.83(19) | C(29)-Cu(4)-Cu(2)     | 85.6(3)    |
| Cu(4)#1-Cu(7)-Cu(3)#1 | 58.08(3)   | N(3)-Cu(3)-Cu(7)#1 | 156.30(17) | C(29)-Cu(4)-Cu(3)     | 54.0(4)    |
| Cu(4)#1-Cu(7)-Cu(8)#1 | 58.18(3)   | N(4)-Cu(2)-C(10)   | 94.6(2)    | C(29)-Cu(4)-Cu(5)     | 91.9(3)    |
| Cu(4)-Cu(2)-Cu(1)     | 71.16(4)   | N(4)-Cu(2)-C(41)   | 121.2(2)   | C(29)-Cu(4)-Cu(6)     | 153.7(3)   |
| Cu(4)-Cu(3)-Cu(7)#1   | 60.57(4)   | N(4)-Cu(2)-C(42)   | 152.0(3)   | C(29)-Cu(4)-Cu(7)#1   | 59.8(2)    |
| Cu(4)-Cu(5)-Cu(1)     | 70.38(4)   | N(4)-Cu(2)-C(9)    | 105.3(2)   | C(29)-Cu(4)-Cu(8)     | 105.9(4)   |
| Cu(4)-Cu(6)-Cu(7)     | 106.37(4)  | N(4)-Cu(2)-Cu(1)   | 162.07(18) | C(29)-Cu(4)-Cu(9)     | 51.1(4)    |
| Cu(4)-Cu(6)-Cu(8)     | 58.27(3)   | N(4)-Cu(2)-Cu(4)   | 114.20(18) | C(29)-Cu(9)-C(8)#1    | 104.6(3)   |
| Cu(4)-Cu(8)-Cu(6)     | 52.25(3)   | N(5)-Cu(5)-C(41)   | 113.7(2)   | C(29)-Cu(9)-Cu(4)     | 47.0(3)    |
| Cu(4)-Cu(8)-Cu(7)#1   | 57.92(3)   | N(5)-Cu(5)-C(42)   | 147.4(3)   | C(29)-Cu(9)-Cu(7)#1   | 59.2(2)    |
| Cu(4)-Cu(8)-Cu(9)     | 59.52(3)   | N(5)-Cu(5)-C(54)   | 98.9(2)    | C(29)-Cu(9)-Cu(8)     | 101.7(3)   |
| Cu(4)-Cu(9)-Cu(8)     | 59.95(3)   | N(5)-Cu(5)-C(55)   | 105.9(2)   | C(41)-Cu(2)-C(10)     | 143.4(2)   |
| Cu(5)-Cu(4)-Cu(2)     | 71.92(4)   | N(5)-Cu(5)-Cu(1)   | 168.88(18) | C(41)-Cu(2)-C(9)      | 129.9(2)   |
| Cu(5)-Cu(4)-Cu(7)#1   | 133.83(4)  | N(5)-Cu(5)-Cu(4)   | 114.78(17) | C(41)-Cu(2)-Cu(1)     | 73.67(18)  |
| Cu(5)-Cu(4)-Cu(8)     | 94.75(4)   | N(6)-Cu(9)-C(29)   | 110.9(3)   | C(41)-Cu(2)-Cu(4)     | 94.98(17)  |
| Cu(5)-Cu(4)-Cu(9)     | 74.30(4)   | N(6)-Cu(9)-C(7)#1  | 109.7(3)   | C(41)-Cu(5)-C(54)     | 144.7(3)   |
| Cu(6)-Cu(4)-Cu(2)     | 105.65(4)  | N(6)-Cu(9)-C(8)#1  | 144.4(3)   | C(41)-Cu(5)-C(55)     | 137.3(3)   |
| Cu(6)-Cu(4)-Cu(3)     | 105.89(5)  | N(6)-Cu(9)-Cu(4)   | 113.10(16) | C(41)-Cu(5)-Cu(1)     | 73.73(19)  |
| Cu(6)-Cu(4)-Cu(5)     | 114.03(5)  | N(6)-Cu(9)-Cu(7)#1 | 170.06(18) | C(41)-Cu(5)-Cu(4)     | 99.70(19)  |
| Cu(6)-Cu(4)-Cu(7)#1   | 96.83(4)   | N(6)-Cu(9)-Cu(8)   | 120.52(19) | C(42)-Cu(1)-Cu(2)     | 45.2(2)    |
| Cu(6)-Cu(4)-Cu(8)     | 69.48(4)   | C(42)-Cu(1)-Cu(5)  | 44.2(2)    | C(55)-Cu(8)-Cu(4)     | 46.92(19)  |
| Cu(6)-Cu(4)-Cu(9)     | 129.94(5)  | C(42)-Cu(1)-N(2)   | 174.9(3)   | C(55)-Cu(8)-Cu(6)     | 61.25(19)  |
| Cu(6)-Cu(7)-Cu(3)#1   | 159.31(5)  | C(42)-Cu(2)-C(10)  | 110.1(3)   | C(55)-Cu(8)-Cu(7)     | 110.49(19) |
| Cu(6)-Cu(7)-Cu(4)#1   | 136.98(5)  | C(42)-Cu(2)-C(41)  | 33.4(3)    | C(55)-Cu(8)-Cu(7)#1   | 103.94(19) |
| Cu(6)-Cu(7)-Cu(8)#1   | 78.99(4)   | C(42)-Cu(2)-C(9)   | 102.7(3)   | C(55)-Cu(8)-Cu(9)     | 75.72(18)  |
| Cu(6)-Cu(7)-Cu(9)#1   | 102.63(4)  | C(42)-Cu(2)-Cu(1)  | 40.6(2)    | C(56)#1-Cu(3)-C(29)   | 102.3(3)   |
| Cu(7)#1-Cu(4)-Cu(8)   | 63.90(4)   | C(42)-Cu(2)-Cu(4)  | 85.86(18)  | C(56)#1-Cu(3)-C(57)#1 | 34.9(3)    |
| Cu(7)#1-Cu(8)-Cu(6)   | 83.82(4)   | C(42)-Cu(5)-C(41)  | 34.8(3)    | C(56)#1-Cu(3)-Cu(4)   | 93.0(2)    |

|                       |            |                      |            |                       |            |
|-----------------------|------------|----------------------|------------|-----------------------|------------|
| Cu(7)#1-Cu(9)-Cu(4)   | 60.31(3)   | C(42)-Cu(5)-C(54)    | 110.3(3)   | C(56)#1-Cu(3)-Cu(7)#1 | 44.6(2)    |
| Cu(7)#1-Cu(9)-Cu(8)   | 63.96(4)   | C(42)-Cu(5)-C(55)    | 106.6(3)   | C(56)-Cu(7)-C(29)#1   | 97.8(4)    |
| Cu(7)-Cu(6)-Cu(8)     | 52.60(3)   | C(42)-Cu(5)-Cu(1)    | 39.0(2)    | C(56)-Cu(7)-C(8)      | 161.5(3)   |
| Cu(7)-Cu(8)-Cu(4)     | 102.78(4)  | C(42)-Cu(5)-Cu(4)    | 86.29(19)  | C(56)-Cu(7)-Cu(3)#1   | 48.47(19)  |
| Cu(7)-Cu(8)-Cu(6)     | 54.75(3)   | C(54)-Cu(5)-Cu(1)    | 72.15(16)  | C(56)-Cu(7)-Cu(4)#1   | 93.9(2)    |
| Cu(7)-Cu(8)-Cu(7)#1   | 93.84(4)   | C(54)-Cu(5)-Cu(4)    | 77.27(18)  | C(56)-Cu(7)-Cu(6)     | 111.1(2)   |
| Cu(7)-Cu(8)-Cu(9)     | 150.68(5)  | C(55)-Cu(4)-C(29)    | 125.4(4)   | C(56)-Cu(7)-Cu(8)     | 53.1(2)    |
| Cu(8)-Cu(7)-Cu(3)#1   | 92.56(4)   | C(55)-Cu(4)-Cu(2)    | 114.65(19) | C(56)-Cu(7)-Cu(8)#1   | 128.0(2)   |
| Cu(8)-Cu(7)-Cu(4)#1   | 98.68(4)   | C(55)-Cu(4)-Cu(3)    | 172.38(19) | C(56)-Cu(7)-Cu(9)#1   | 146.2(2)   |
| Cu(8)-Cu(7)-Cu(6)     | 72.65(4)   | C(55)-Cu(4)-Cu(5)    | 53.86(18)  | C(56)-Cu(8)-C(55)     | 116.8(3)   |
| Cu(8)-Cu(7)-Cu(8)#1   | 86.16(4)   | C(55)-Cu(4)-Cu(6)    | 72.01(19)  | C(56)-Cu(8)-C(7)#1    | 109.3(3)   |
| Cu(8)-Cu(7)-Cu(9)#1   | 144.58(5)  | C(55)-Cu(4)-Cu(7)#1  | 111.31(19) | C(56)-Cu(8)-C(8)#1    | 117.1(3)   |
| Cu(9)#1-Cu(7)-Cu(3)#1 | 97.78(4)   | C(55)-Cu(4)-Cu(8)    | 48.43(19)  | C(56)-Cu(8)-Cu(4)     | 145.2(2)   |
| Cu(9)#1-Cu(7)-Cu(4)#1 | 60.16(3)   | C(55)-Cu(4)-Cu(9)    | 77.10(19)  | C(56)-Cu(8)-Cu(6)     | 93.2(2)    |
| Cu(9)#1-Cu(7)-Cu(8)#1 | 58.78(3)   | C(55)-Cu(5)-C(54)    | 30.3(3)    | C(56)-Cu(8)-Cu(7)     | 48.9(2)    |
| Cu(9)-Cu(4)-Cu(7)#1   | 59.53(3)   | C(55)-Cu(5)-Cu(1)    | 69.81(17)  | C(56)-Cu(8)-Cu(7)#1   | 131.5(2)   |
| Cu(9)-Cu(4)-Cu(8)     | 60.54(3)   | C(55)-Cu(5)-Cu(4)    | 47.28(18)  | C(56)-Cu(8)-Cu(9)     | 154.9(2)   |
| Cu(9)-Cu(8)-Cu(6)     | 111.72(4)  | C(55)-Cu(8)-C(7)#1   | 115.7(2)   | C(57)#1-Cu(3)-C(29)   | 134.8(3)   |
| Cu(9)-Cu(8)-Cu(7)#1   | 57.26(4)   | C(55)-Cu(8)-C(8)#1   | 124.7(3)   | C(57)#1-Cu(3)-Cu(4)   | 122.75(19) |
| C(57)#1-Cu(3)-Cu(7)#1 | 78.95(18)  | C(8)#1-Cu(8)-Cu(7)#1 | 42.31(19)  | C(8)-Cu(7)-Cu(9)#1    | 51.75(19)  |
| C(7)#1-Cu(8)-Cu(4)    | 105.35(18) | C(8)#1-Cu(8)-Cu(9)   | 49.81(16)  | C(9)-Cu(2)-C(10)      | 28.9(2)    |
| C(7)#1-Cu(8)-Cu(6)    | 154.09(19) | C(8)#1-Cu(9)-Cu(4)   | 92.48(18)  | C(9)-Cu(2)-Cu(1)      | 65.33(18)  |
| C(7)#1-Cu(8)-Cu(7)    | 133.68(16) | C(8)#1-Cu(9)-Cu(7)#1 | 45.52(19)  | C(9)-Cu(2)-Cu(4)      | 45.83(17)  |
| C(7)#1-Cu(8)-Cu(7)#1  | 71.79(19)  | C(8)#1-Cu(9)-Cu(8)   | 51.32(19)  | C(9)-Cu(4)-C(29)      | 119.0(5)   |
| C(7)#1-Cu(8)-Cu(9)    | 47.23(17)  | C(8)-Cu(6)-C(9)      | 111.9(3)   | C(9)-Cu(4)-C(55)      | 114.1(3)   |
| C(7)#1-Cu(9)-C(29)    | 139.4(3)   | C(8)-Cu(6)-Cu(4)     | 116.7(2)   | C(9)-Cu(4)-Cu(2)      | 56.78(18)  |
| C(7)#1-Cu(9)-C(8)#1   | 34.8(3)    | C(8)-Cu(6)-Cu(7)     | 48.1(2)    | C(9)-Cu(4)-Cu(3)      | 68.9(2)    |
| C(7)#1-Cu(9)-Cu(4)    | 115.62(19) | C(8)-Cu(6)-Cu(8)     | 90.87(19)  | C(9)-Cu(4)-Cu(5)      | 114.5(2)   |
| C(7)#1-Cu(9)-Cu(7)#1  | 80.3(2)    | C(8)-Cu(7)-C(29)#1   | 100.5(4)   | C(9)-Cu(4)-Cu(6)      | 55.11(19)  |
| C(7)#1-Cu(9)-Cu(8)    | 57.4(2)    | C(8)-Cu(7)-Cu(3)#1   | 149.22(19) | C(9)-Cu(4)-Cu(7)#1    | 111.2(2)   |
| C(8)#1-Cu(8)-C(7)#1   | 31.6(3)    | C(8)-Cu(7)-Cu(4)#1   | 96.9(2)    | C(9)-Cu(4)-Cu(8)      | 123.77(18) |
| C(8)#1-Cu(8)-Cu(4)    | 91.14(18)  | C(8)-Cu(7)-Cu(6)     | 51.47(19)  | C(9)-Cu(4)-Cu(9)      | 168.3(2)   |
| C(8)#1-Cu(8)-Cu(6)    | 125.94(19) | C(8)-Cu(7)-Cu(8)     | 110.17(19) | C(9)-Cu(6)-Cu(4)      | 49.52(18)  |
| C(8)#1-Cu(8)-Cu(7)    | 113.27(17) | C(8)-Cu(7)-Cu(8)#1   | 49.2(2)    | C(9)-Cu(6)-Cu(7)      | 143.1(2)   |
| C(9)-Cu(6)-Cu(8)      | 107.19(18) |                      |            |                       |            |

Symmetry transformations used to generate equivalent atoms:

#1 -x+1,-y+1,-z+1    #2 -x+1,-y+1,-z

## Reference

1. G. M. Sheldrick, *SHELXT*– Integrated space-group and crystal-structure determination, *Acta Crystallogr., Sect. A: Found. Adv.*, 2015, **71**, 3-8.
2. O. V. Dolomanov, L. J. Bourhis, R. J. Gildea, J. A. K. Howard and H. Puschmann, OLEX2: a complete structure solution, refinement and analysis program, *J. Appl. Crystallogr.*, 2009, **42**, 339-341.



3. G. M. Sheldrick, Crystal structure refinement with *SHELXL*, *Acta Crystallogr., Sect. C: Struct. Chem.*, 2015, **71**, 3-8.
4. S. A. P. a. Z. W. H. V. R. Dias, Coinage metal complexes of 3,5-bis(trifluoromethyl)pyrazolate ligand synthesis and characterization of  $\{[3,5-(CF_3)_2Pz]Cu\}_3$  and  $\{[3,5-(CF_3)_2Pz]Ag\}_3$ , *J. Fluor. Chem.*, 2000, **103**, 163–169.
5. A. Eichhöfer, G. Buth, S. Lebedkin, M. Kühn and F. Weigend, Luminescence in phosphine-stabilized copper chalcogenide cluster molecules—a comparative study, *Inorg. Chem.*, 2015, **54**, 9413-9422.
6. Q. Benito, X. F. Le Goff, S. Maron, A. Fargues, A. Garcia, C. Martineau, F. Taulelle, S. Kahlal, T. Gacoin, J.-P. Boilot and S. Perruchas, Polymorphic copper Iodide clusters: Insights into the mechanochromic luminescence properties, *J. Am. Chem. Soc.*, 2014, **136**, 11311-11320.
7. Q. Benito, X. F. Le Goff, G. Nocton, A. Fargues, A. Garcia, A. Berhault, S. Kahlal, J.-Y. Saillard, C. Martineau, J. Trébosc, T. Gacoin, J.-P. Boilot and S. Perruchas, Geometry flexibility of copper Iodide clusters: variability in luminescence thermochromism, *Inorg. Chem.*, 2015, **54**, 4483-4494.
8. H. Li, H. Zhai, C. Zhou, Y. Song, F. Ke, W. W. Xu and M. Zhu, Atomically precise copper cluster with Intensely near-Infrared luminescence and Its mechanism, *J. Phys. Chem. Lett.*, 2020, **11**, 4891-4896.
9. X.-X. Yang, I. Issac, S. Lebedkin, M. Kühn, F. Weigend, D. Fenske, O. Fuhr and A. Eichhöfer, Red-luminescent biphosphine stabilized 'Cu<sub>12</sub>S<sub>6</sub>' cluster molecules, *Chem. Commun.*, 2014, **50**, 11043-11045.
10. K. Zhang, Y. Shen, X. Yang, J. Liu, T. Jiang, N. Finney, B. Spingler and S. Duttwyler, Atomically defined monocarborene copper(I) acetylides with structural and luminescence properties tuned by ligand sterics, *Chem. Eur. J.*, 2019, **25**, 8754–8759.
11. Y. L. Li, J. Wang, P. Luo, X. H. Ma, X. Y. Dong, Z. Y. Wang, C. X. Du, S. Q. Zang and T. C. W. Mak, Cu<sub>14</sub> cluster with partial Cu(0) character: difference in electronic structure from Isostructural silver analog, *Adv. Sci.*, 2019, **6**, 1900833.
12. M. Olaru, E. Rychagova, S. Ketkov, Y. Shynkarenko, S. Yakunin, M. V. Kovalenko, A. Yablonskiy, B. Andreev, F. Kleemiss, J. Beckmann and M. Vogt, A small cationic organo-copper cluster as thermally robust highly photo- and electroluminescent material, *J. Am. Chem. Soc.*, 2020, **142**, 373-381.
13. I. S. Krytchankou, I. O. Koshevoy, V. V. Gurzhiy, V. A. Pomogaev and S. P. Tunik, Luminescence solvato- and vapochromism of alkynyl-phosphine copper clusters, *Inorg. Chem.*, 2015, **54**, 8288-8297.
14. X.-Y. Chang, K.-H. Low, J.-Y. Wang, J.-S. Huang and C.-M. Che, From cluster to polymer: Ligand cone angle controlled syntheses and structures of copper(I) alkynyl complexes, *Angew. Chem., Int. Ed.*, 2016, **55**, 10312-10316.
15. M.-M. Zhang, X.-Y. Dong, Z.-Y. Wang, H.-Y. Li, S.-J. Li, X. Zhao and S.-Q. Zang, AIE triggers the circularly polarized luminescence of atomically precise enantiomeric copper(I) alkynyl clusters, *Angew. Chem., Int. Ed.*, 2020, **59**, 10052-10058.
16. S.-L. Li, F.-Q. Zhang and X.-M. Zhang, An organic-ligand-free thermochromic luminescent cuprous iodide trinuclear cluster: evidence for cluster centered emission and configuration distortion with temperature, *Chem. Commun.*, 2015, **51**, 8062-8065.
17. G. te Velde, F. M. Bickelhaupt, E. J. Baerends, C. Fonseca Guerra, S. J. A. van Gisbergen, J. G. Snijders and T. Ziegler, Chemistry with ADF, *J. Comput. Chem.*, 2001, **22**, 931-967.
18. C. Fonseca Guerra, J. G. Snijders, G. te Velde and E. J. Baerends, Towards an order-N DFT method, *Theor. Chem. Account.*, 1998, **99**, 391-403.
19. S. Grimme, J. Antony, S. Ehrlich and H. Krieg, A consistent and accurate *ab initio* parametrization of density functional dispersion correction (DFT-D) for the 94 elements H-Pu, *J. Chem. Phys.*, 2010, **132**, 154104.
20. E. Van Lenthe and E. J. Baerends, Optimized Slater-type basis sets for the elements 1–118, *J. Comput. Chem.*, 2003, **24**, 1142-1156.

21. M. J. Frisch, G. W. Trucks, H. B. Schlegel, G. E. Scuseria, M. A. Robb, J. R. Cheeseman, G. Scalmani, V. Barone, G. A. Petersson, H. Nakatsuji, X. Li, M. Caricato, A. V. Marenich, J. Bloino, B. G. Janesko, R. Gomperts, B. Mennucci, H. P. Hratchian, J. V. Ortiz, A. F. Izmaylov, J. L. Sonnenberg, Williams, F. Ding, F. Lipparini, F. Egidi, J. Goings, B. Peng, A. Petrone, T. Henderson, D. Ranasinghe, V. G. Zakrzewski, J. Gao, N. Rega, G. Zheng, W. Liang, M. Hada, M. Ehara, K. Toyota, R. Fukuda, J. Hasegawa, M. Ishida, T. Nakajima, Y. Honda, O. Kitao, H. Nakai, T. Vreven, K. Throssell, J. A. Montgomery Jr., J. E. Peralta, F. Ogliaro, M. J. Bearpark, J. J. Heyd, E. N. Brothers, K. N. Kudin, V. N. Staroverov, T. A. Keith, R. Kobayashi, J. Normand, K. Raghavachari, A. P. Rendell, J. C. Burant, S. S. Iyengar, J. Tomasi, M. Cossi, J. M. Millam, M. Klene, C. Adamo, R. Cammi, J. W. Ochterski, R. L. Martin, K. Morokuma, O. Farkas, J. B. Foresman and D. J. Fox, *Gaussian 16 Rev. C.01 Journal*, 2016.
22. F. Weigend and R. Ahlrichs, Balanced basis sets of split valence, triple zeta valence and quadruple zeta valence quality for H to Rn: Design and assessment of accuracy, *Phys. Chem. Chem. Phys.*, 2005, **7**, 3297-3305.
23. T. Lu and F. Chen, Multiwfn: A multifunctional wavefunction analyzer, *J. Comput. Chem.*, 2012, **33**, 580-592.
24. W. Humphrey, A. Dalke and K. Schulten, VMD: Visual molecular dynamics, *J. Mol. Graphics*, 1996, **14**, 33-38.
25. J. F. Rudzinski, K. Kremer and T. Berau, Communication: Consistent interpretation of molecular simulation kinetics using Markov state models biased with external information, *J. Chem. Phys.*, 2016, **144**, 051102.
26. E. v. Lenthe, E. J. Baerends and J. G. Snijders, Relativistic total energy using regular approximations, *J. Chem. Phys.*, 1994, **101**, 9783-9792.
27. E. v. Lenthe, E. J. Baerends and J. G. Snijders, Relativistic regular two-component Hamiltonians, *J. Chem. Phys.*, 1993, **99**, 4597-4610.
28. E. v. Lenthe, J. G. Snijders and E. J. Baerends, The zero-order regular approximation for relativistic effects: The effect of spin-orbit coupling in closed shell molecules, *J. Chem. Phys.*, 1996, **105**, 6505-6516.
